# Supplementary material for: Direct chemical inspection of eye shadow and lipstick solid samples using laser-induced breakdown spectroscopy (LIBS) and chemometrics: proposition of classification models
Source: Royal Society of Chemistry journal article supplement (doi:10.1039/c6ay01138a), 2016-01-01
Supplement: c6ay01138a1.pdf [file c6ay01138a1.pdf]

Supplementary information

**Direct chemical inspection of eye shadow and lipstick solid samples using laser-induced breakdown spectroscopy (LIBS) and chemometrics: proposition of classification models**

Amanda dos Santos Augusto, Érica Ferreira Batista and Edenir Rodrigues Pereira-Filho\*

*Federal University of São Carlos, Chemistry Department, Group of Applied Instrumental Analysis, P.O. Box 676, Zip Code 13565-905, São Carlos – São Paulo State, Brazil.*

*\*Corresponding author: erpf@ufscar.br*

*Phone: +55 16 3351-8092*

*Fax: +55 16 3351-8350*

**Table 1S** Emission lines for ICP OES determination.

| <b>Analytes</b> | <b>Emission lines (nm)</b> |
|-----------------|----------------------------|
| Cd              | 228.8(I)                   |
| Co              | 228.6(II)                  |
| Cr              | 283.5(II)/357.8(I)         |
| Cu              | 224.7(II)/324.7(I)         |
| Ni              | 231.6(II)/341.4(I)         |

\*Atomic (I) or ionic (II) lines

**Table 2S** 2<sup>3</sup> Full factorial design, central point (11 experiments) and averaged norm.

| Experiment | Laser energy |           | Spot size   |           | Delay time  |           | Average norm<br>(n = 25) |
|------------|--------------|-----------|-------------|-----------|-------------|-----------|--------------------------|
|            | Coded level  | Real (mJ) | Coded level | Real (μm) | Coded level | Real (μs) |                          |
| 1          | 0            | 75        | 0           | 150       | 0           | 1         | 4,941                    |
| 2          | 0            | 75        | 0           | 150       | 0           | 1         | 7,056                    |
| 3          | 0            | 75        | 0           | 150       | 0           | 1         | 4,320                    |
| 4          | -1           | 50        | -1          | 50        | -1          | 0.5       | 7,309                    |
| 5          | 1            | 100       | -1          | 50        | -1          | 0.5       | 21,646                   |
| 6          | -1           | 50        | 1           | 250       | -1          | 0.5       | 1,138                    |
| 7          | 1            | 100       | 1           | 250       | -1          | 0.5       | 9,000                    |
| 8          | -1           | 50        | -1          | 150       | 1           | 1.5       | 1,497                    |
| 9          | 1            | 100       | -1          | 50        | 1           | 1.5       | 7,930                    |
| 10         | -1           | 50        | 1           | 250       | 1           | 1.5       | 516                      |
| 11         | 1            | 100       | 1           | 250       | 1           | 1.5       | 1,473                    |

**Table 3S** Effects and percentage values of the variables (1 = laser energy, 2 = spot size and 3 = delay time) and its interactions (12, 13, 23 and 123).

| <b>Variables and interaction effects</b> | <b>Calculated effect values</b> | <b>Percentage of each effect</b> |
|------------------------------------------|---------------------------------|----------------------------------|
| 3 (delay time)                           | -6,919                          | 27                               |
| 2 (spot size)                            | -6,564                          | 24                               |
| 13                                       | -3,702                          | 8                                |
| 12                                       | -2,988                          | 5                                |
| 123                                      | 250                             | 0                                |
| 23                                       | 2,845                           | 5                                |
| 1 (laser energy)                         | 7,398                           | 31                               |

**Table 4S:** RSD values description for eyeshadow samples

| Emission line          | Signal type    | Average RSD | RSD range |        | Emission line          | Signal type    | Average RSD | RSD range |        |
|------------------------|----------------|-------------|-----------|--------|------------------------|----------------|-------------|-----------|--------|
|                        |                |             | Lower     | Higher |                        |                |             | Lower     | Higher |
| 1: C I<br>(193.091)    | Area<br>Height | 23          | 7         | 49     | 19: Mg II<br>(293.651) | Area<br>Height | 36          | 18        | 50     |
| 2: Si I<br>(212.412)   | Area<br>Height | 30          | 12        | 50     | 20: Ti II<br>(306.622) | Area<br>Height | 36          | 13        | 49     |
| 3: Si I<br>(221.667)   | Area<br>Height | 29          | 10        | 50     | 21: Ti II<br>(307.297) | Area<br>Height | 38          | 14        | 50     |
| 4: Fe II<br>(234.349)  | Area<br>Height | 30          | 10        | 50     | 22: Ti II<br>(307.522) | Area<br>Height | 36          | 17        | 50     |
| 5: C I<br>(247.856)    | Area<br>Height | 35          | 15        | 50     | 23: Ti II<br>(307.864) | Area<br>Height | 38          | 19        | 50     |
| 6: Fe II<br>(274.320)  | Area<br>Height | 24          | 7         | 49     | 24: Ti II<br>(308.802) | Area<br>Height | 38          | 20        | 50     |
| 7: Fe II<br>(274.648)  | Area<br>Height | 38          | 16        | 50     | 25: Ti I<br>(334.188)  | Area<br>Height | 38          | 18        | 50     |
| 8: Fe II<br>(274.948)  | Area<br>Height | 37          | 12        | 50     | 26: Ti II<br>(334.904) | Area<br>Height | 37          | 22        | 50     |
| 9: Fe I<br>(275.403)   | Area<br>Height | 35          | 13        | 50     | 27: Ti II<br>(336.121) | Area<br>Height | 37          | 17        | 50     |
| 10: Fe II<br>(275.573) | Area<br>Height | -           | -         | -      | 28: Ti II<br>(337.280) | Area<br>Height | 36          | 19        | 50     |
| 11: Mg I<br>(277.983)  | Area<br>Height | 35          | 15        | 49     | 29: Ti II<br>(338.376) | Area<br>Height | 37          | 21        | 50     |
| 12: Mg II<br>(279.078) | Area<br>Height | 36          | 15        | 50     | 30: Ca II<br>(393.366) | Area<br>Height | 38          | 20        | 50     |
| 13: Mg II<br>(279.533) | Area<br>Height | 36          | 15        | 49     | 31: Ca II<br>(396.847) | Area<br>Height | 37          | 20        | 50     |
| 14: Mg II<br>(279.799) | Area<br>Height | 25          | 4         | 50     | 32: Na I<br>(588.995)  | Area<br>Height | 36          | 19        | 50     |
| 15: Mg II<br>(280.270) | Area<br>Height | 24          | 3         | 49     | 33: Na I<br>(589.593)  | Area<br>Height | 35          | 16        | 50     |
| 16: Mg I<br>(285.213)  | Area<br>Height | 32          | 9         | 49     | 35: Li I<br>(670.776)  | Area<br>Height | 36          | 17        | 50     |
| 17: Si I<br>(288.157)  | Area<br>Height | 33          | 10        | 50     | 39: K I<br>(766.490)   | Area<br>Height | 35          | 18        | 49     |
| 18: Mg II<br>(292.863) | Area<br>Height | 32          | 12        | 50     | 40: K I<br>(769.896)   | Area<br>Height | 29          | 11        | 49     |
|                        |                | 37          | 18        | 49     | 42: Ba II<br>(493.409) | Area<br>Height | 30          | 9         | 50     |
|                        |                | 37          | 19        | 50     |                        |                | 29          | 9         | 50     |
|                        |                |             |           |        |                        |                | 41          | 21        | 50     |
|                        |                |             |           |        |                        |                | 38          | 20        | 50     |

**Table 5S:** RSD values description for lipstick samples

| Emission line          | Signal type    | Average RSD | RSD range |          | Emission line          | Signal type    | Average RSD | RSD range |          |
|------------------------|----------------|-------------|-----------|----------|------------------------|----------------|-------------|-----------|----------|
|                        |                |             | Lower     | Higher   |                        |                |             | Lower     | Higher   |
| 1: C I<br>(193.091)    | Area<br>Height | 18<br>18    | 7<br>7    | 27<br>28 | 19: Mg II<br>(293.651) | Area<br>Height | 32<br>39    | 25<br>24  | 43<br>50 |
| 2: Si I<br>(212.412)   | Area<br>Height | 29<br>33    | 27<br>17  | 30<br>50 | 20: Ti II<br>(306.622) | Area<br>Height | 37<br>38    | 22<br>21  | 49<br>50 |
| 3: Si I<br>(221.667)   | Area<br>Height | 41<br>37    | 35<br>21  | 48<br>46 | 21: Ti II<br>(307.297) | Area<br>Height | 39<br>39    | 20<br>20  | 50<br>49 |
| 4: Fe II<br>(234.349)  | Area<br>Height | 31<br>33    | 19<br>19  | 48<br>49 | 22: Ti II<br>(307.522) | Area<br>Height | 39<br>39    | 20<br>20  | 50<br>49 |
| 5: C I<br>(247.856)    | Area<br>Height | 18<br>18    | 7<br>9    | 31<br>31 | 23: Ti II<br>(307.864) | Area<br>Height | 39<br>40    | 22<br>21  | 49<br>50 |
| 6: Fe II<br>(274.320)  | Area<br>Height | 37<br>36    | 22<br>20  | 49<br>50 | 24: Ti II<br>(308.802) | Area<br>Height | 39<br>39    | 24<br>23  | 50<br>50 |
| 7: Fe II<br>(274.648)  | Area<br>Height | 34<br>34    | 34<br>18  | 34<br>49 | 25: Ti I<br>(334.188)  | Area<br>Height | 39<br>36    | 25<br>18  | 50<br>50 |
| 8: Fe II<br>(274.948)  | Area<br>Height | 34<br>34    | 34<br>18  | 34<br>49 | 26: Ti II<br>(334.904) | Area<br>Height | 38<br>39    | 19<br>19  | 50<br>50 |
| 9: Fe I<br>(275.403)   | Area<br>Height | -<br>34     | -<br>17   | -<br>50  | 27: Ti II<br>(336.121) | Area<br>Height | 38<br>38    | 23<br>22  | 49<br>49 |
| 10: Fe II<br>(275.573) | Area<br>Height | 32<br>34    | 18<br>17  | 48<br>50 | 28: Ti II<br>(337.280) | Area<br>Height | 39<br>39    | 21<br>19  | 49<br>49 |
| 11: Mg I<br>(277.983)  | Area<br>Height | 40<br>37    | 29<br>22  | 49<br>50 | 29: Ti II<br>(338.376) | Area<br>Height | 41<br>39    | 22<br>20  | 50<br>50 |
| 12: Mg II<br>(279.078) | Area<br>Height | -<br>37     | -<br>17   | -<br>48  | 30: Ca II<br>(393.366) | Area<br>Height | 40<br>36    | 28<br>25  | 48<br>47 |
| 13: Mg II<br>(279.533) | Area<br>Height | 46<br>42    | 42<br>29  | 49<br>48 | 31: Ca II<br>(396.847) | Area<br>Height | 40<br>38    | 31<br>26  | 49<br>49 |
| 14: Mg II<br>(279.799) | Area<br>Height | -<br>43     | -<br>36   | -<br>50  | 32: Na I<br>(588.995)  | Area<br>Height | 36<br>35    | 19<br>22  | 49<br>50 |
| 15: Mg II<br>(280.270) | Area<br>Height | 44<br>43    | 40<br>36  | 50<br>47 | 33: Na I<br>(589.593)  | Area<br>Height | 36<br>35    | 19<br>22  | 49<br>50 |
| 16: Mg I<br>(285.213)  | Area<br>Height | 43<br>41    | 36<br>25  | 47<br>50 | 35: Li I<br>(670.776)  | Area<br>Height | 40<br>34    | 19<br>20  | 48<br>49 |
| 17: Si I<br>(288.157)  | Area<br>Height | 46<br>42    | 42<br>26  | 49<br>50 | 39: K I<br>(766.490)   | Area<br>Height | 34<br>34    | 15<br>14  | 49<br>50 |
| 18: Mg II<br>(292.863) | Area<br>Height | -<br>38     | -<br>23   | -<br>50  | 40: K I<br>(769.896)   | Area<br>Height | 37<br>35    | 17<br>15  | 49<br>47 |
|                        |                |             |           |          | 42: Ba II<br>(493.409) | Area<br>Height | 40<br>37    | 21<br>20  | 47<br>47 |

Spectra obtained for experiments 1, 5, 7 and 10 of the  $2^3$  full factorial design presented at Table 3.

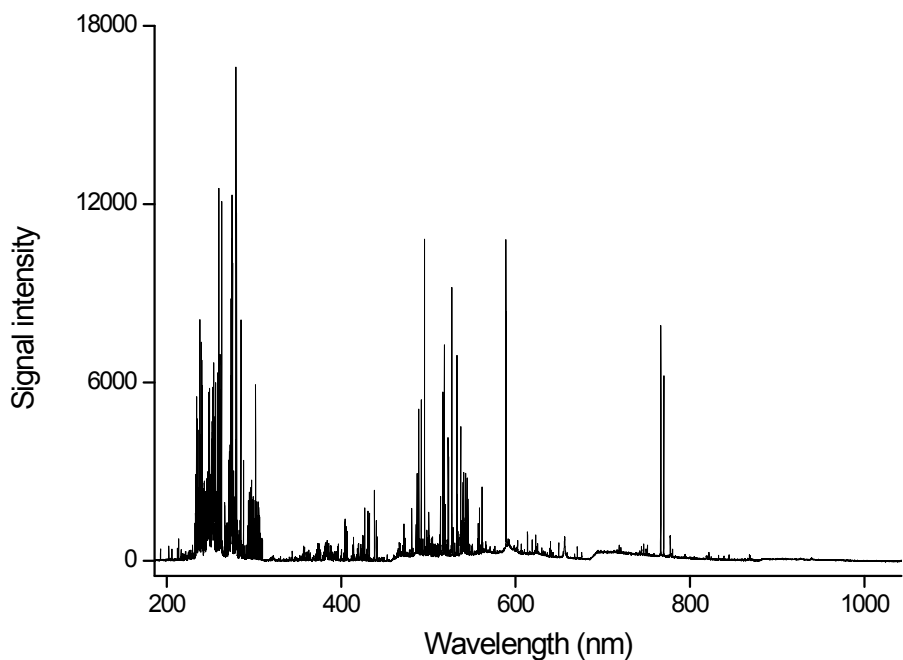

**Figure 1S** – Emission spectrum obtained for eye shadow sample with the experimental conditions (75 mJ, 150  $\mu\text{m}$  and 1  $\mu\text{s}$ ) described in Experiment 1 (see Table 2S).

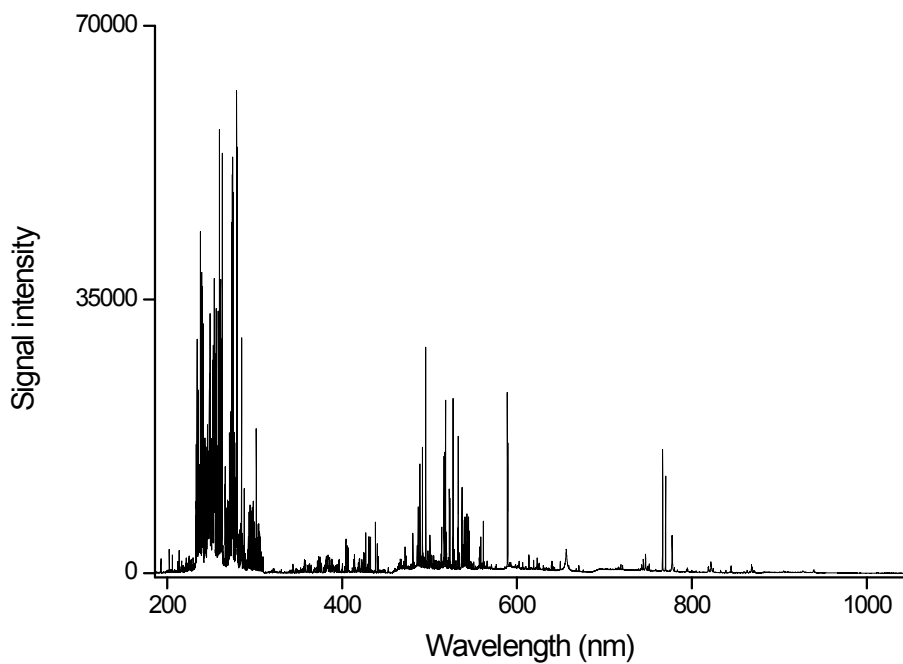

**Figure 2S** – Emission spectrum obtained for eye shadow sample with the experimental conditions (100 mJ, 50  $\mu\text{m}$  and 0.5  $\mu\text{s}$ ) described in Experiment 5 (see Table 2S).

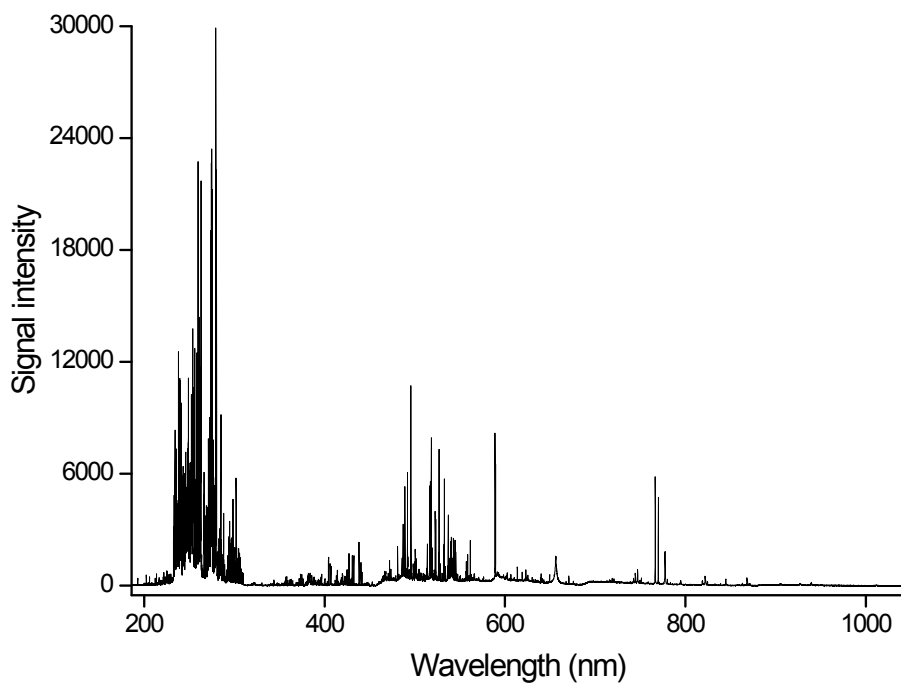

**Figure 3S** – Emission spectrum obtained for eye shadow sample with the experimental conditions (100 mJ, 250  $\mu\text{s}$  and 0.5  $\mu\text{s}$ ) described in Experiment 7 (see Table 2S).

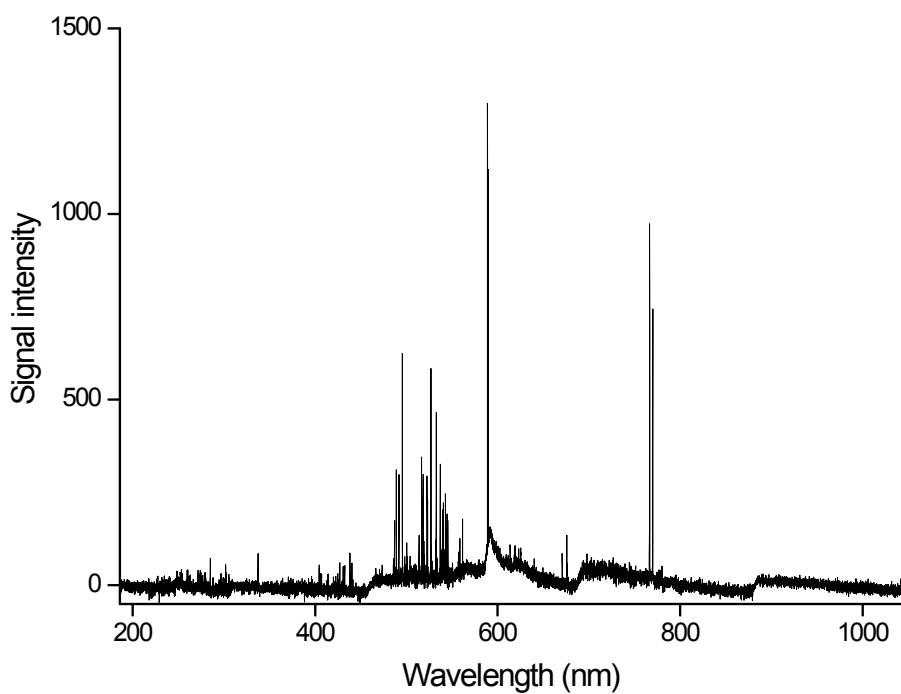

**Figure 4S** – Emission spectrum obtained for eye shadow sample with the experimental conditions (50 mJ, 250  $\mu\text{s}$  and 1.5  $\mu\text{s}$ ) described in Experiment 10 (see Table 2S).



**Emission spectra fragments for eye shadow sample.**

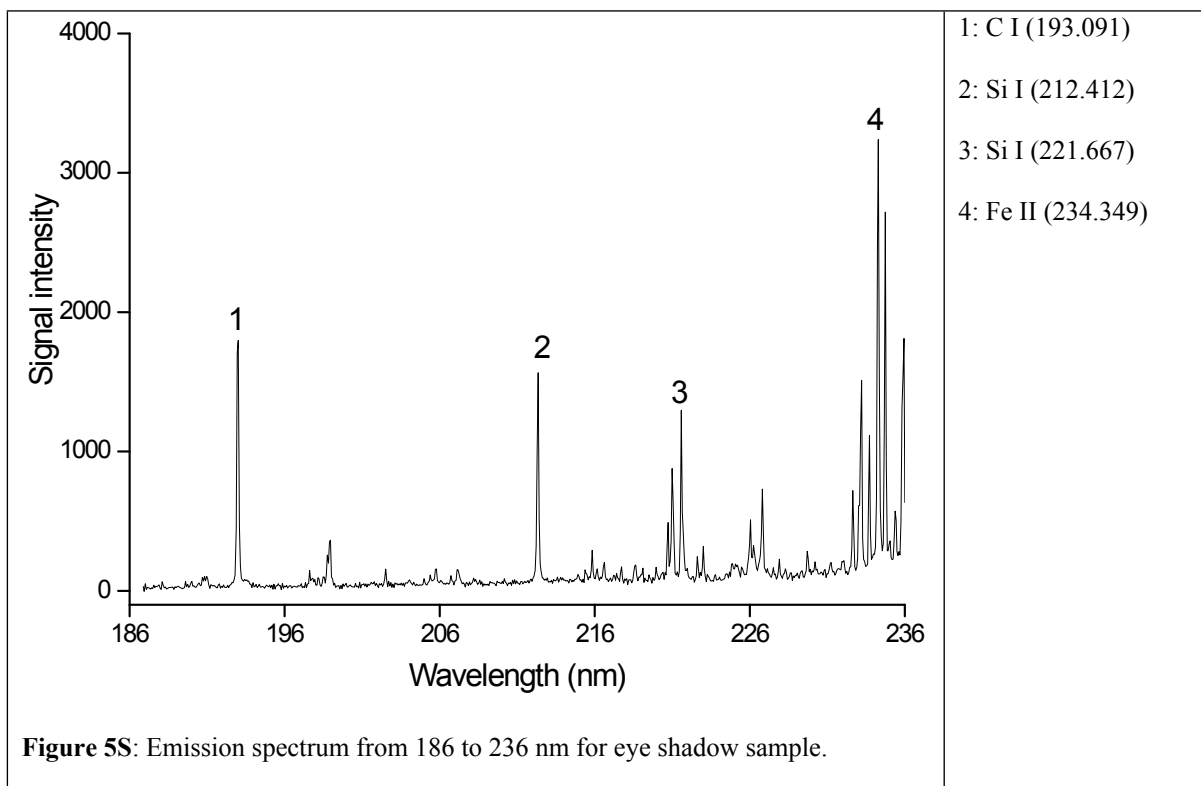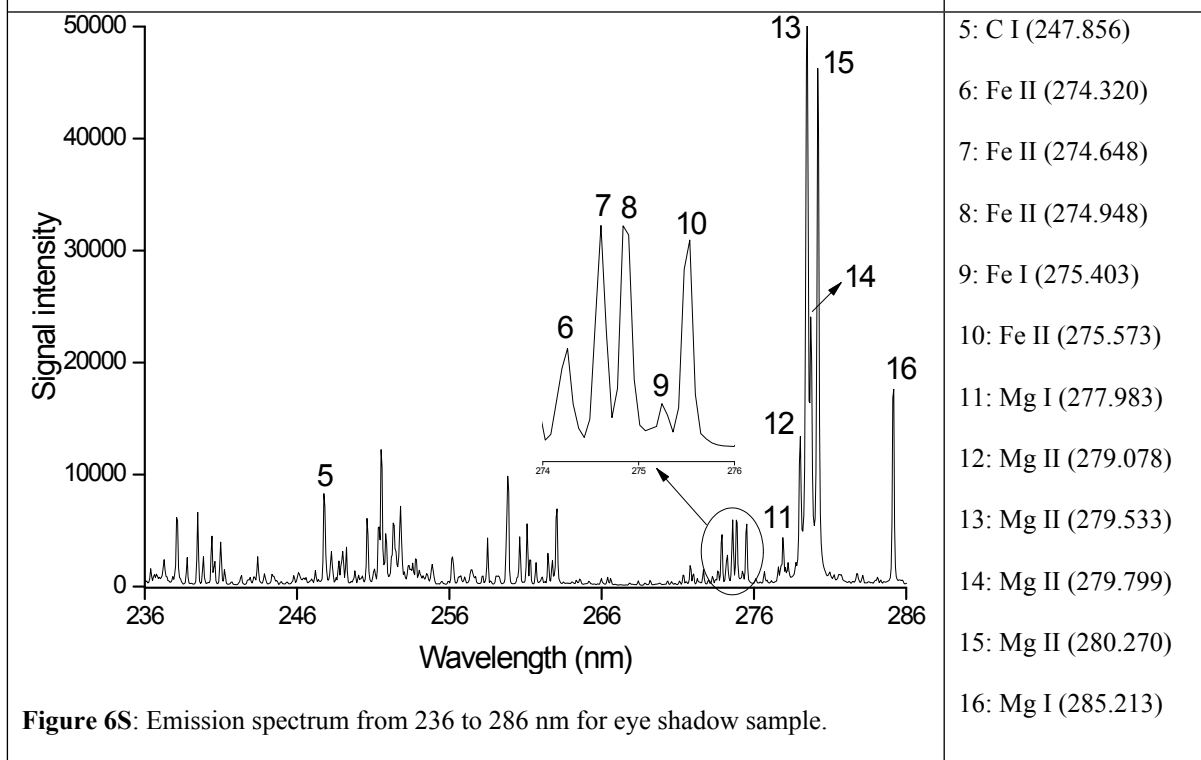

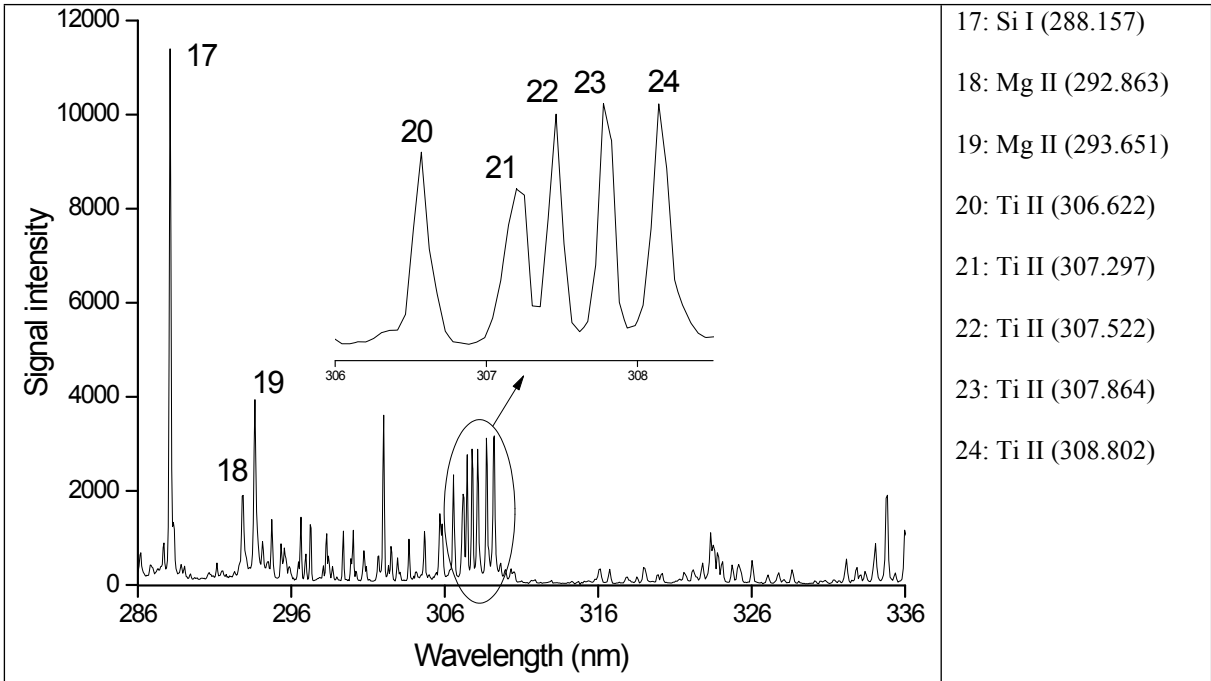

Figure 7S: Emission spectrum from 286 to 336 nm for eye shadow sample.

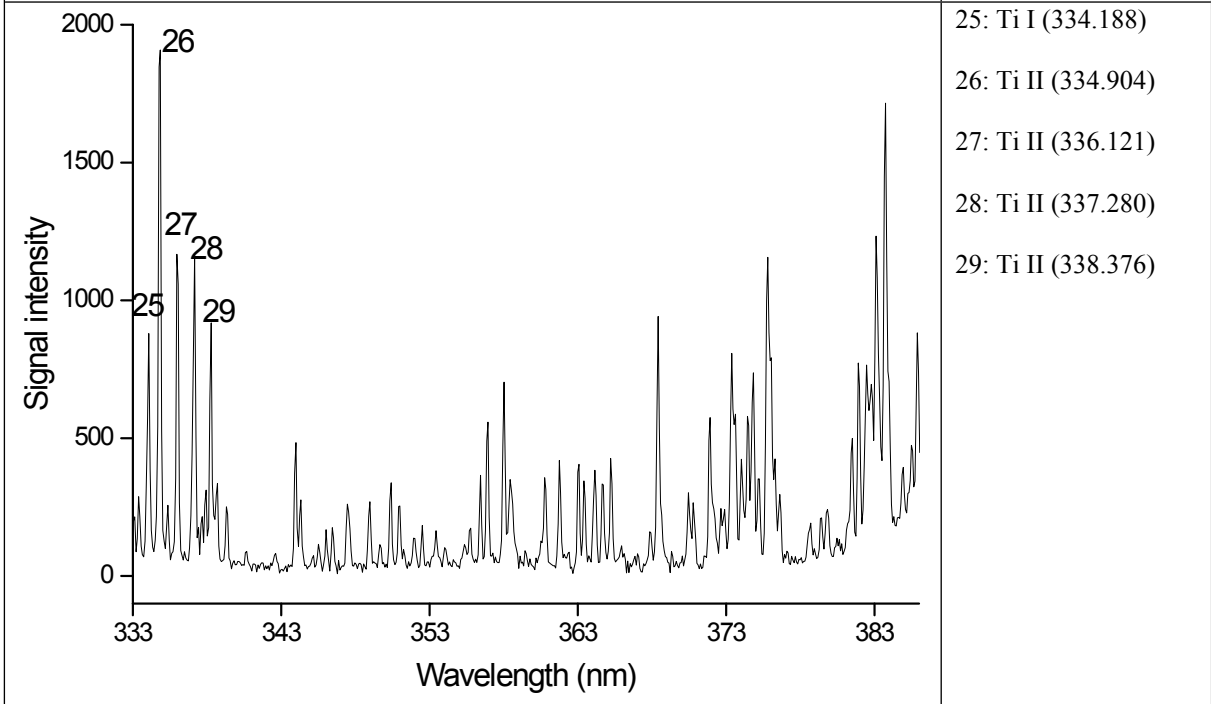

Figure 8S: Emission spectrum from 333 to 386 nm for eye shadow sample.

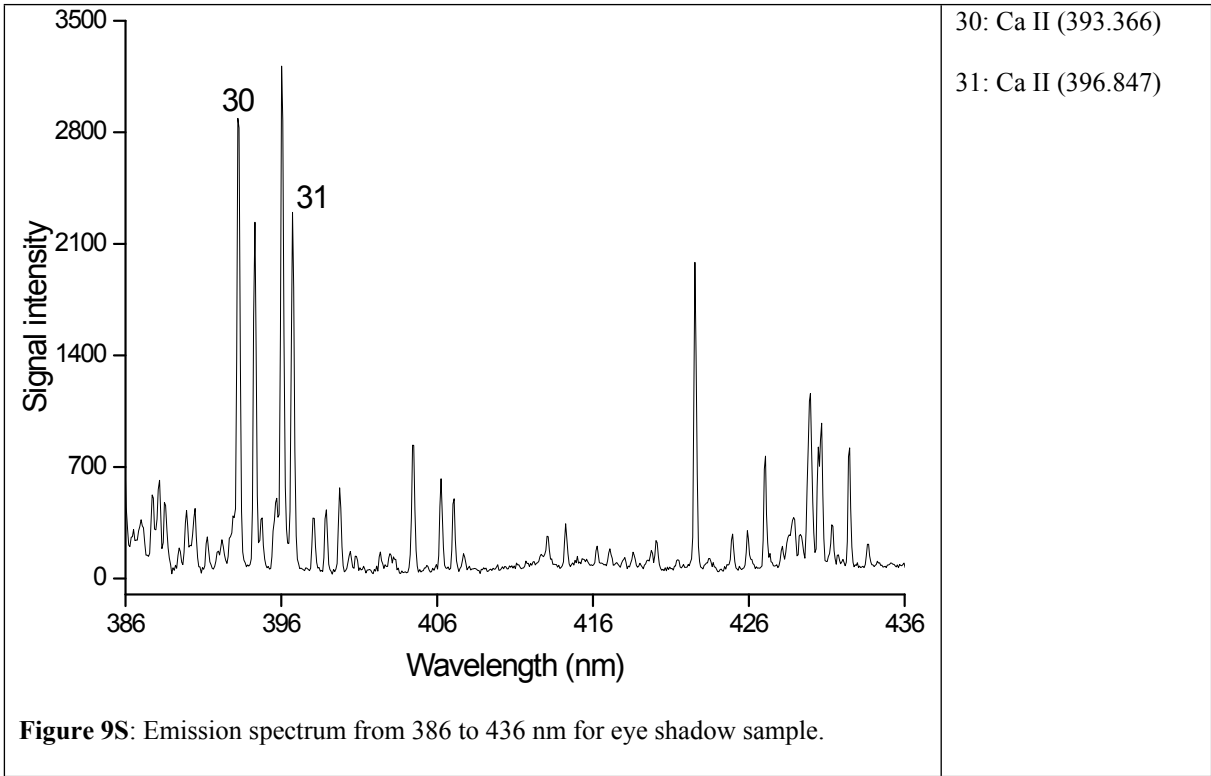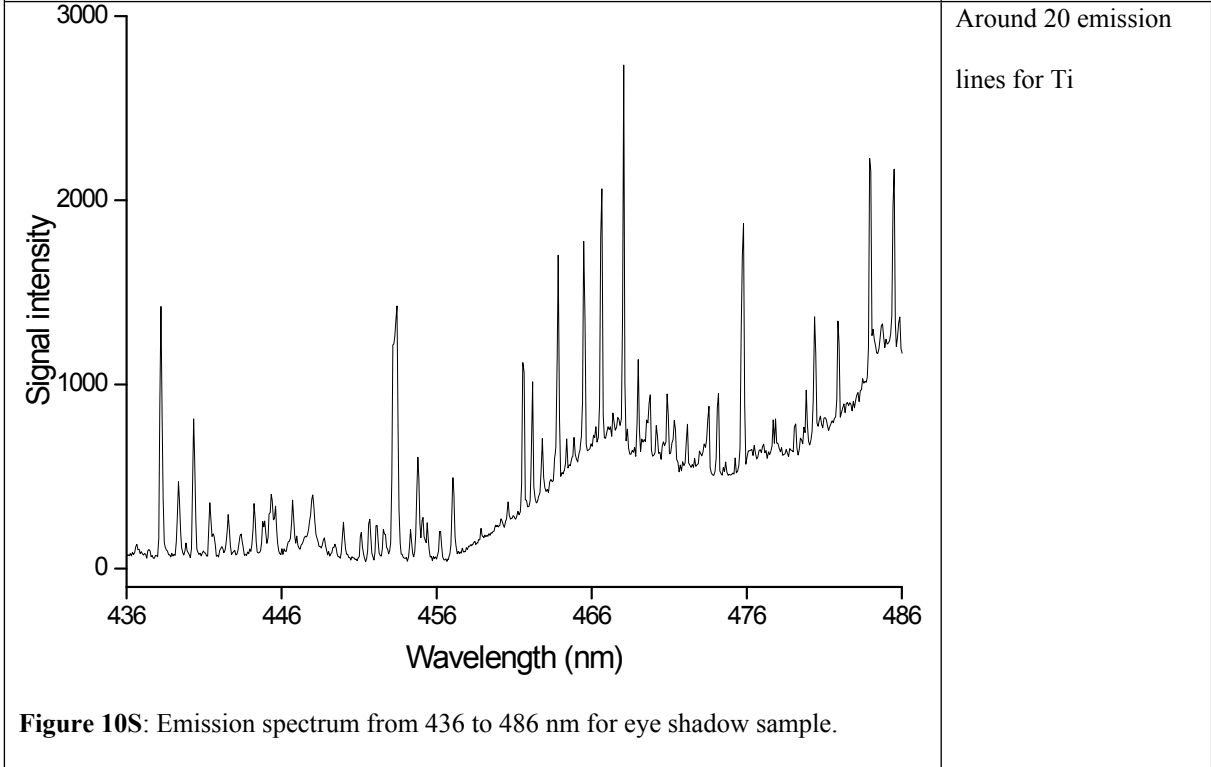

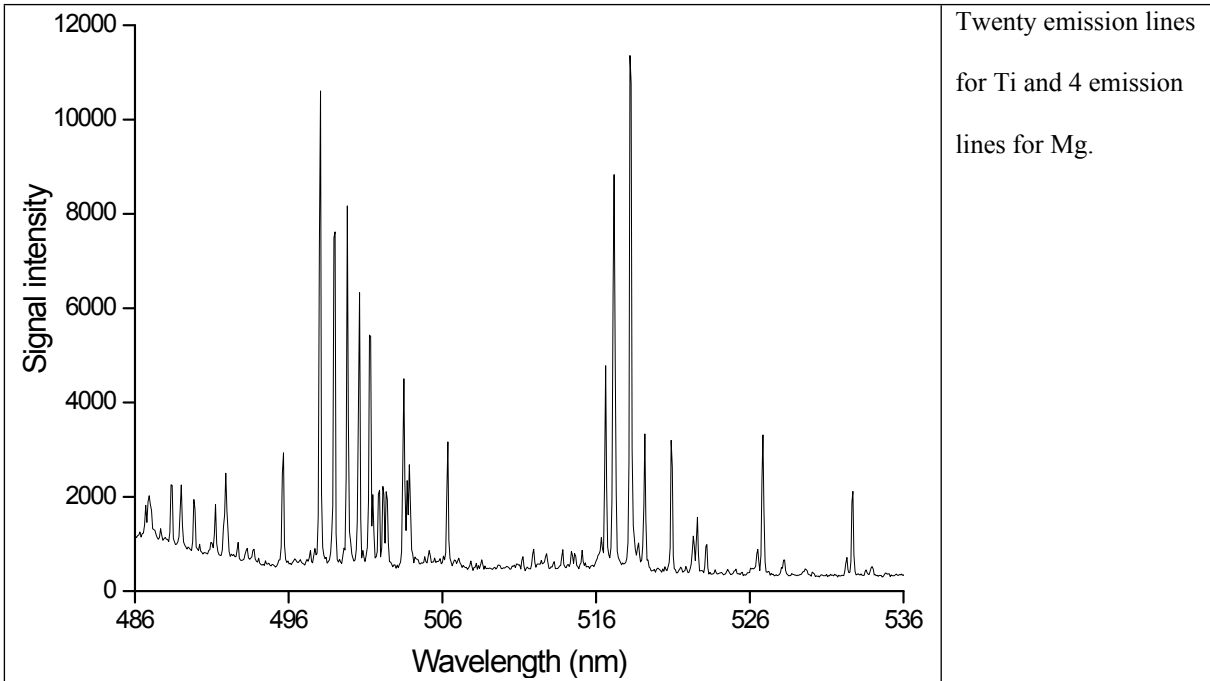

Twenty emission lines  
for Ti and 4 emission  
lines for Mg.

**Figure 11S:** Emission spectrum from 486 to 536 nm for eye shadow sample.

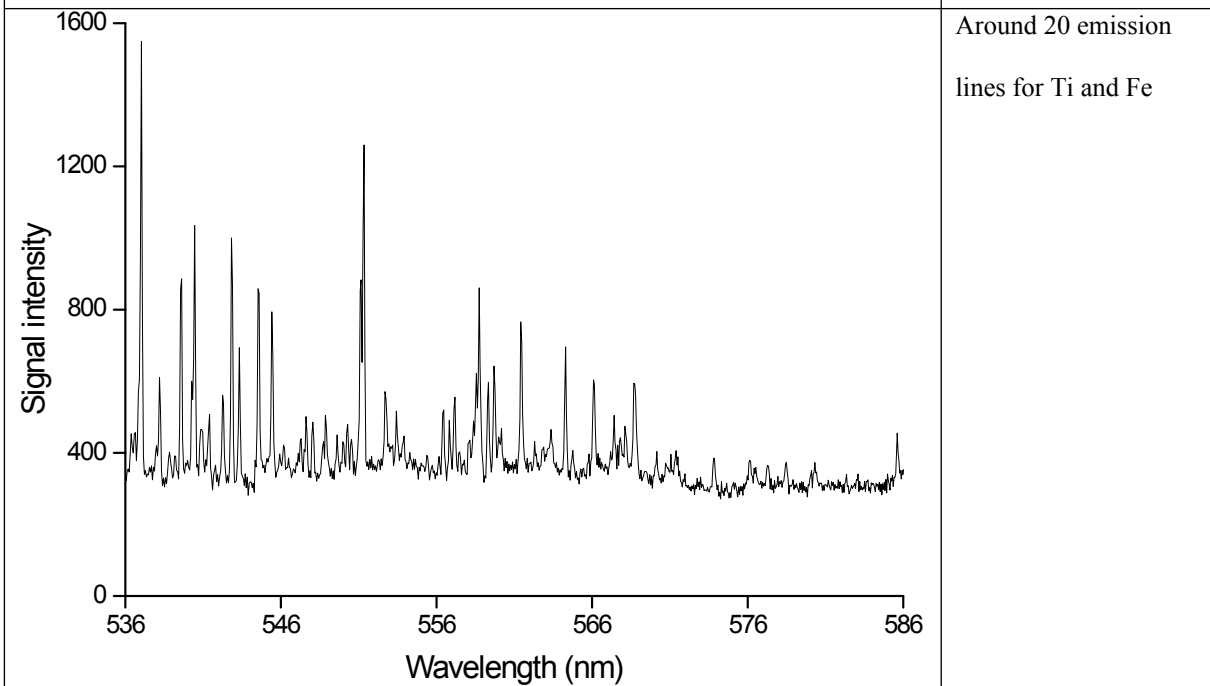

Around 20 emission  
lines for Ti and Fe

**Figure 12S:** Emission spectrum from 536 to 586 nm for eye shadow sample.

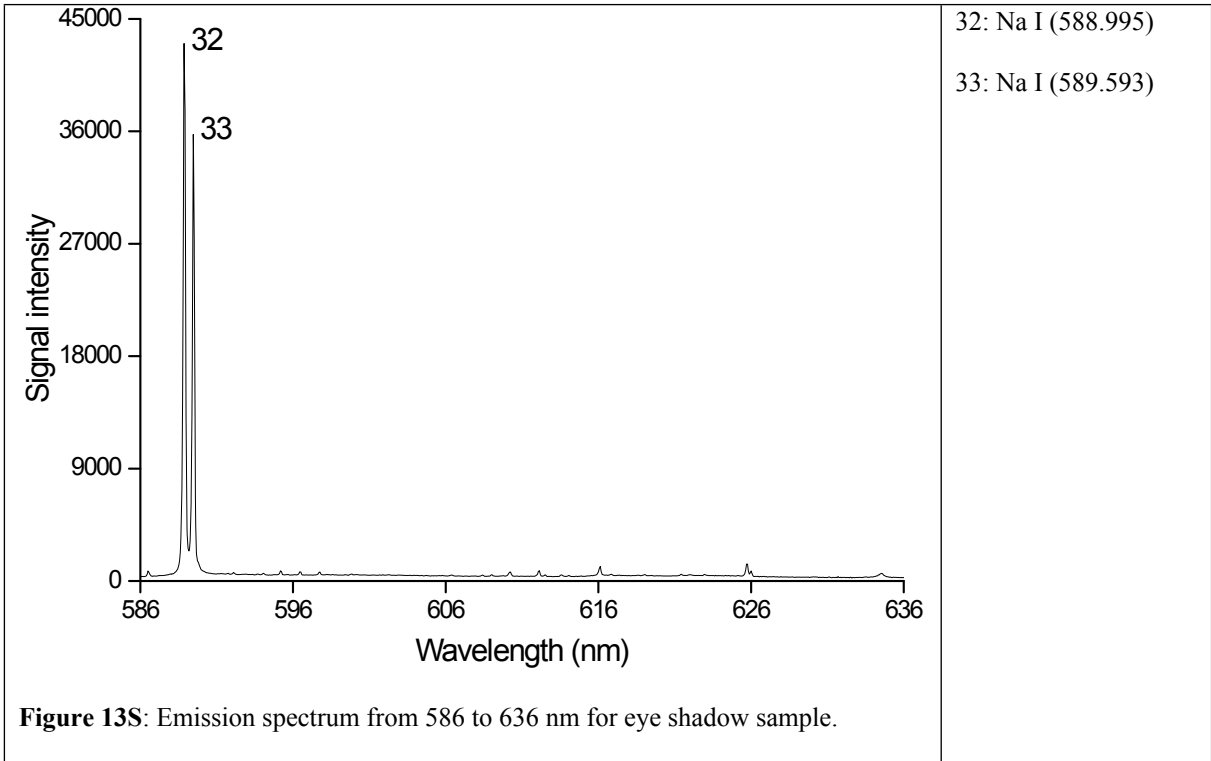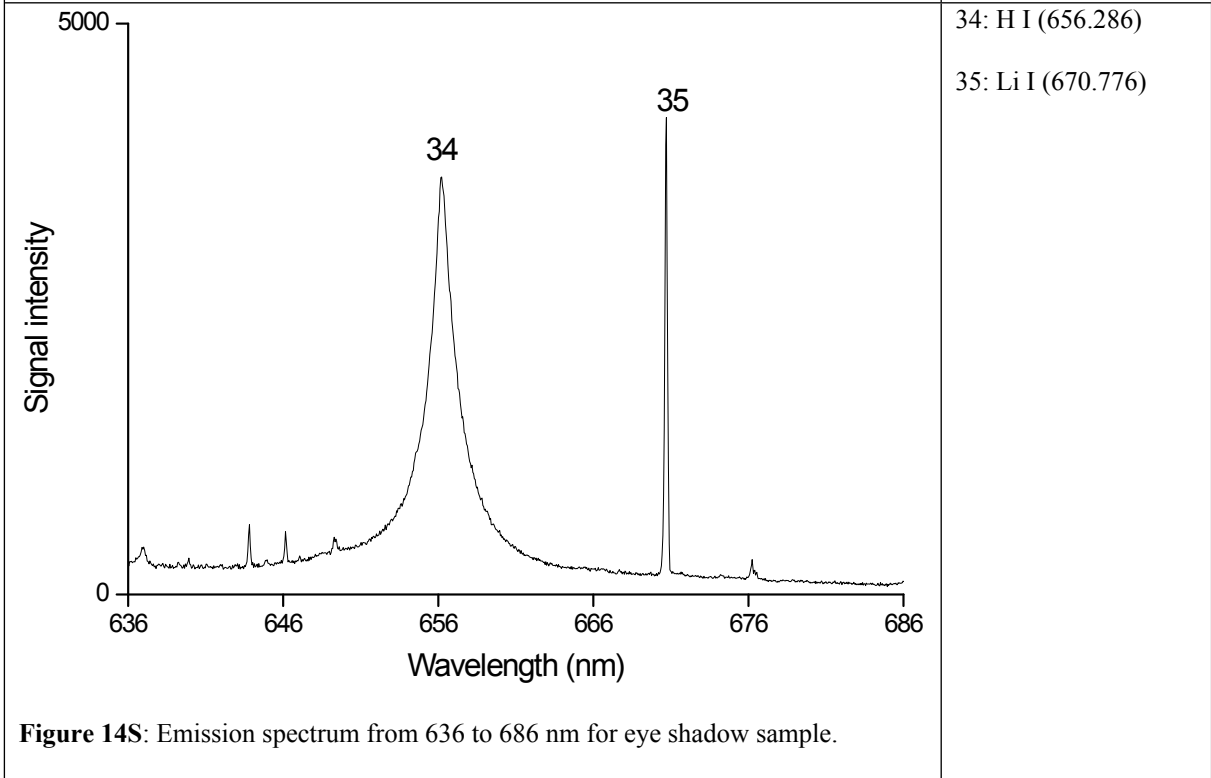

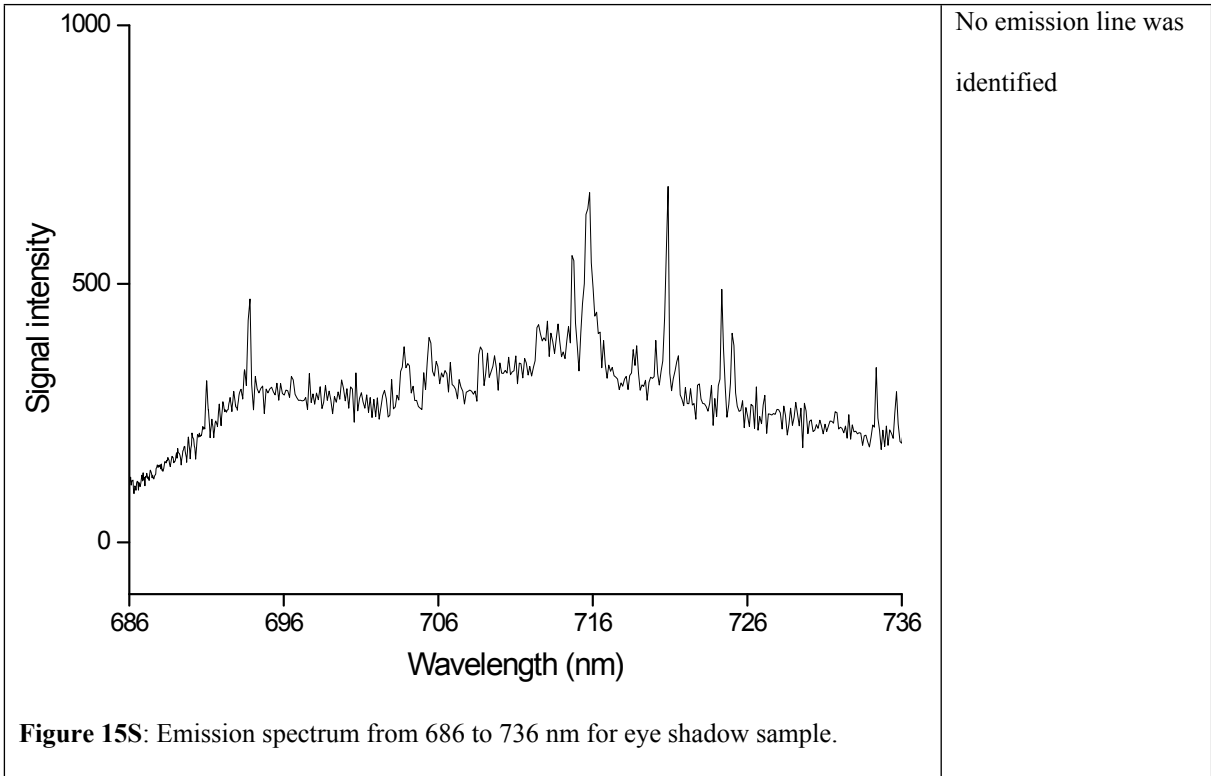

Figure 15S: Emission spectrum from 686 to 736 nm for eye shadow sample.

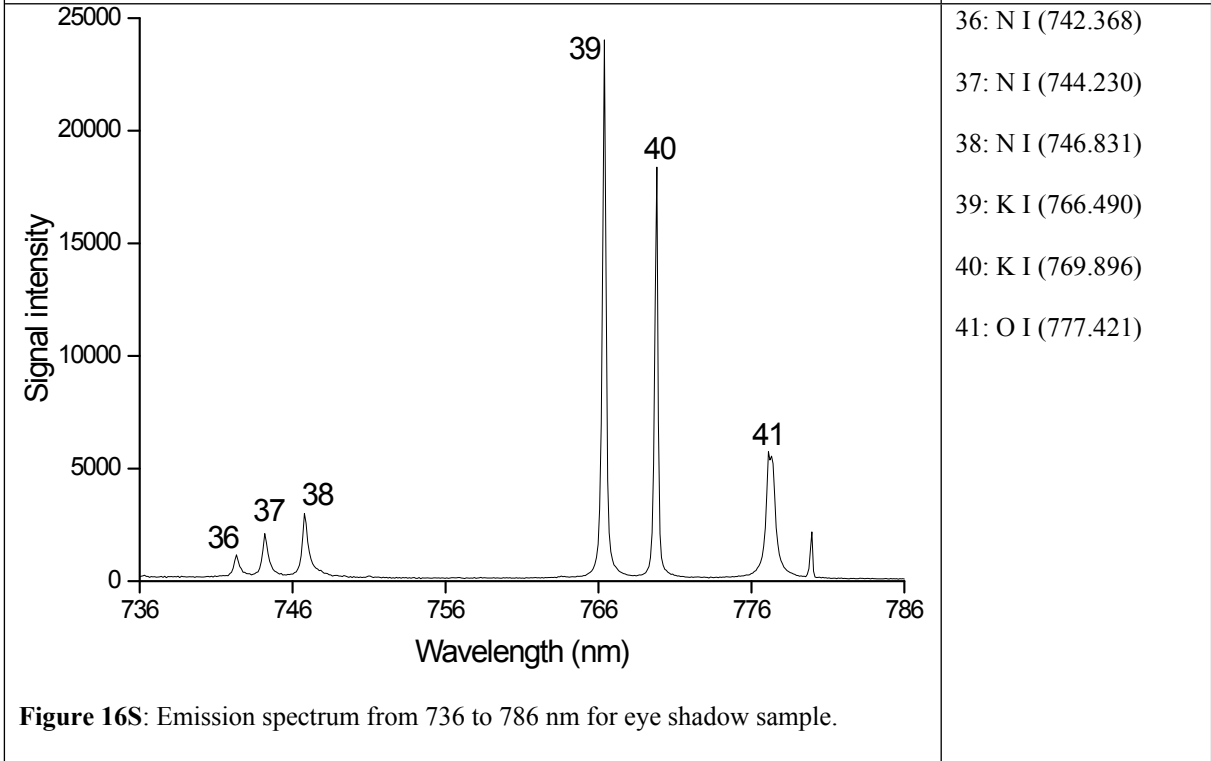

Figure 16S: Emission spectrum from 736 to 786 nm for eye shadow sample.

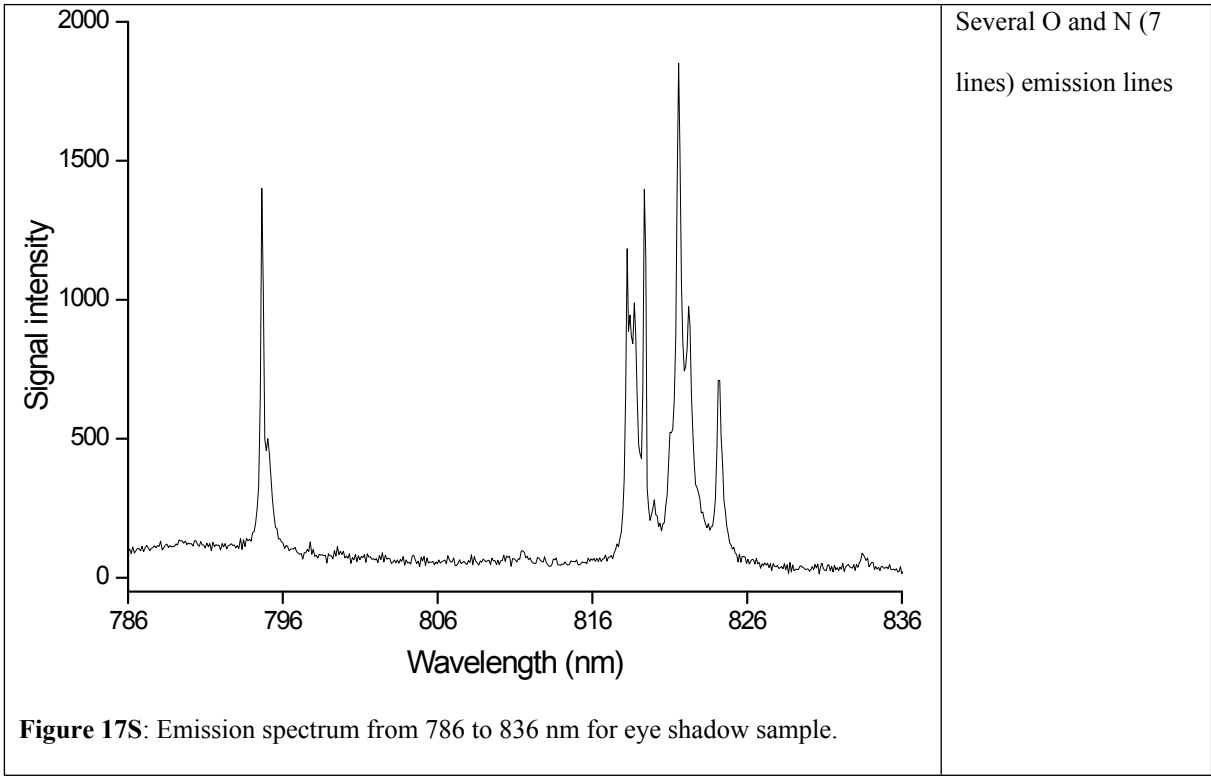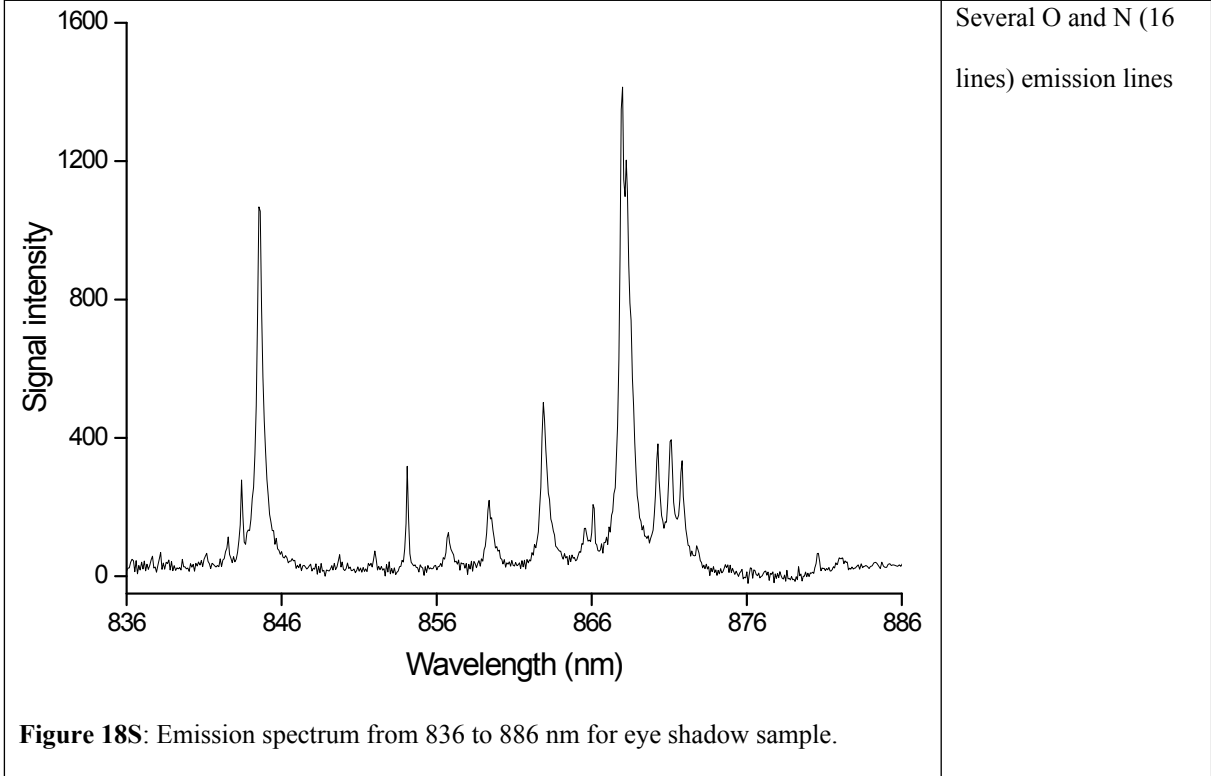

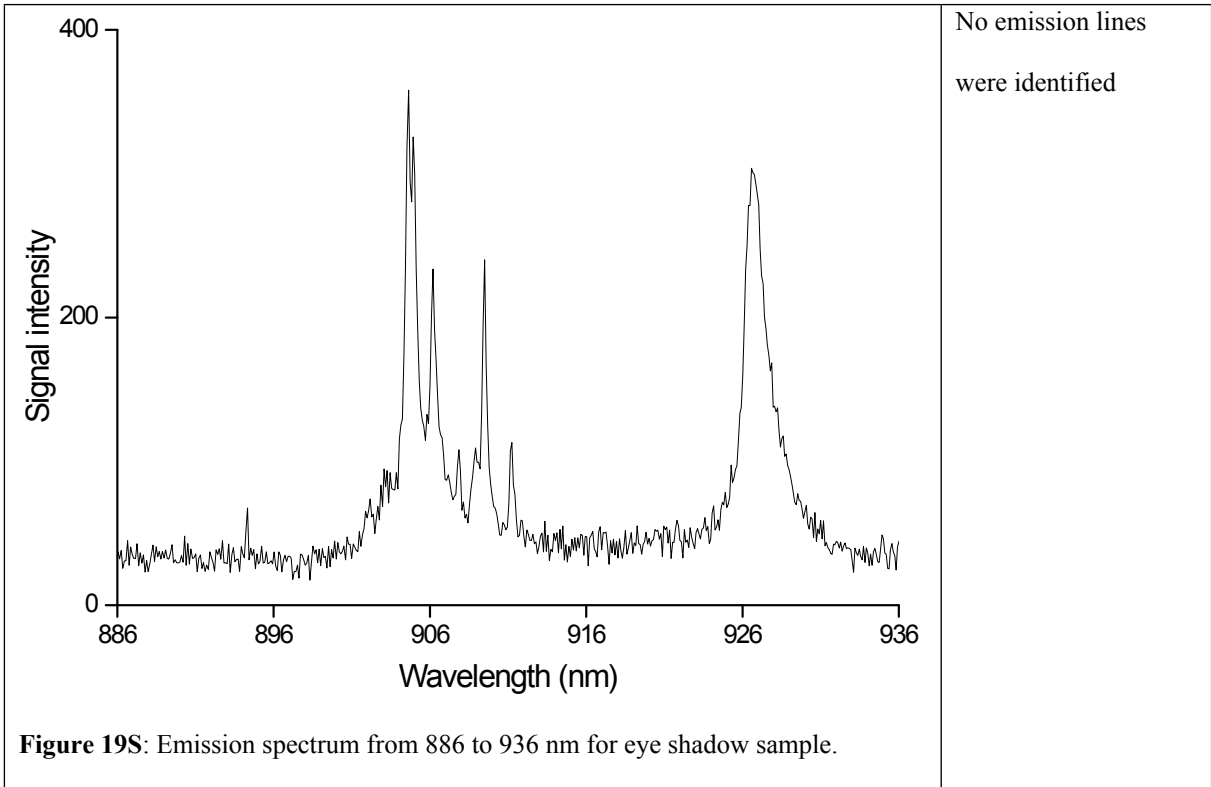

**Figure 19S:** Emission spectrum from 886 to 936 nm for eye shadow sample.

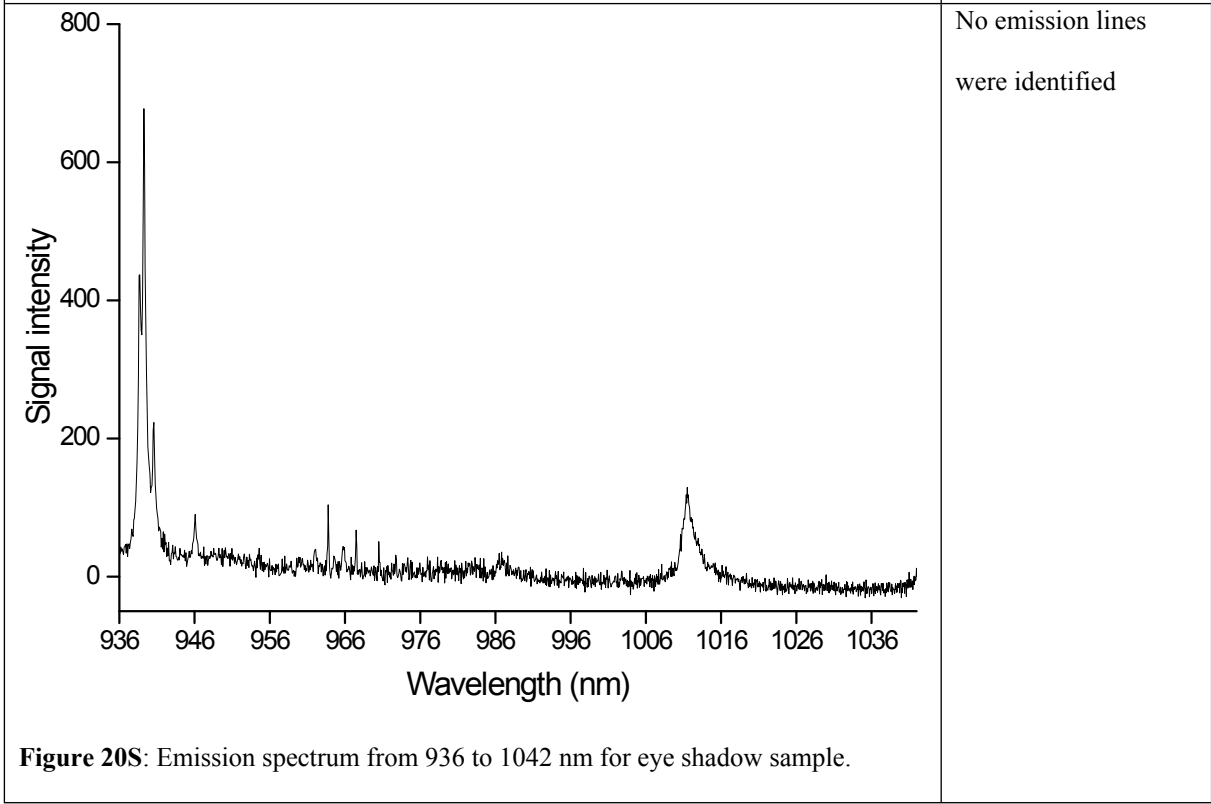

**Figure 20S:** Emission spectrum from 936 to 1042 nm for eye shadow sample.



Emission spectra fragments for lipstick sample.

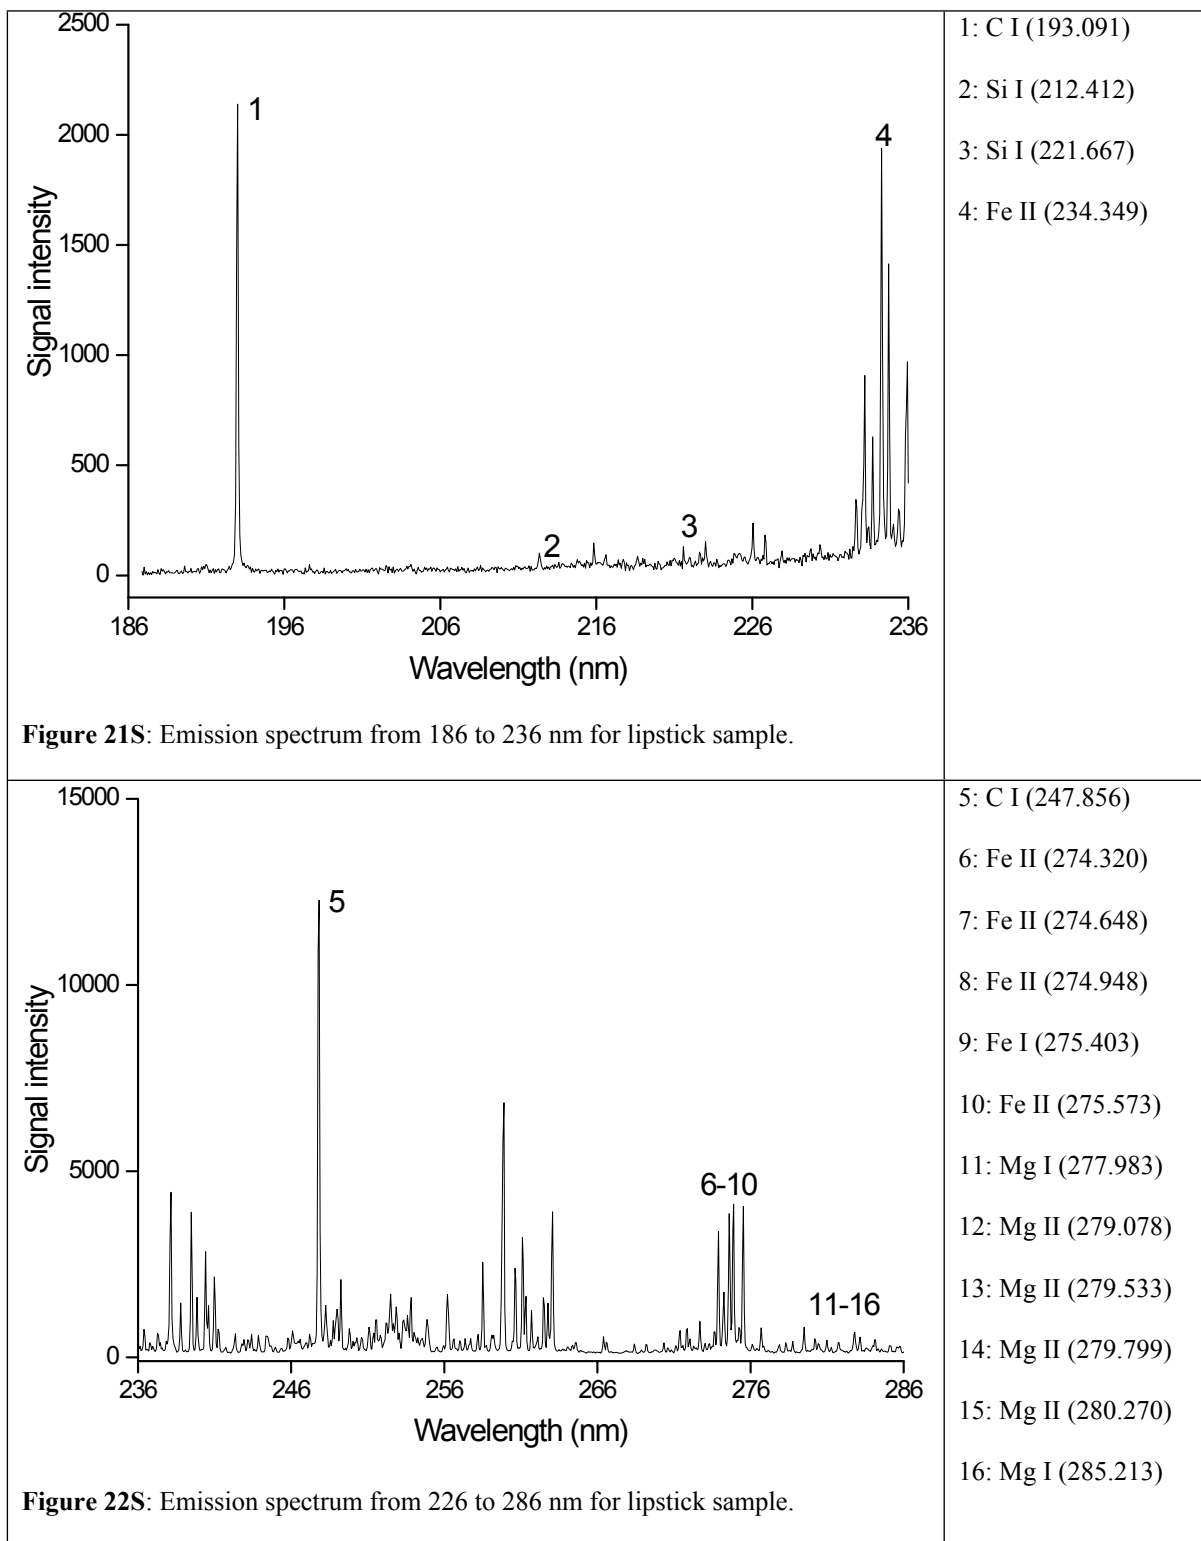

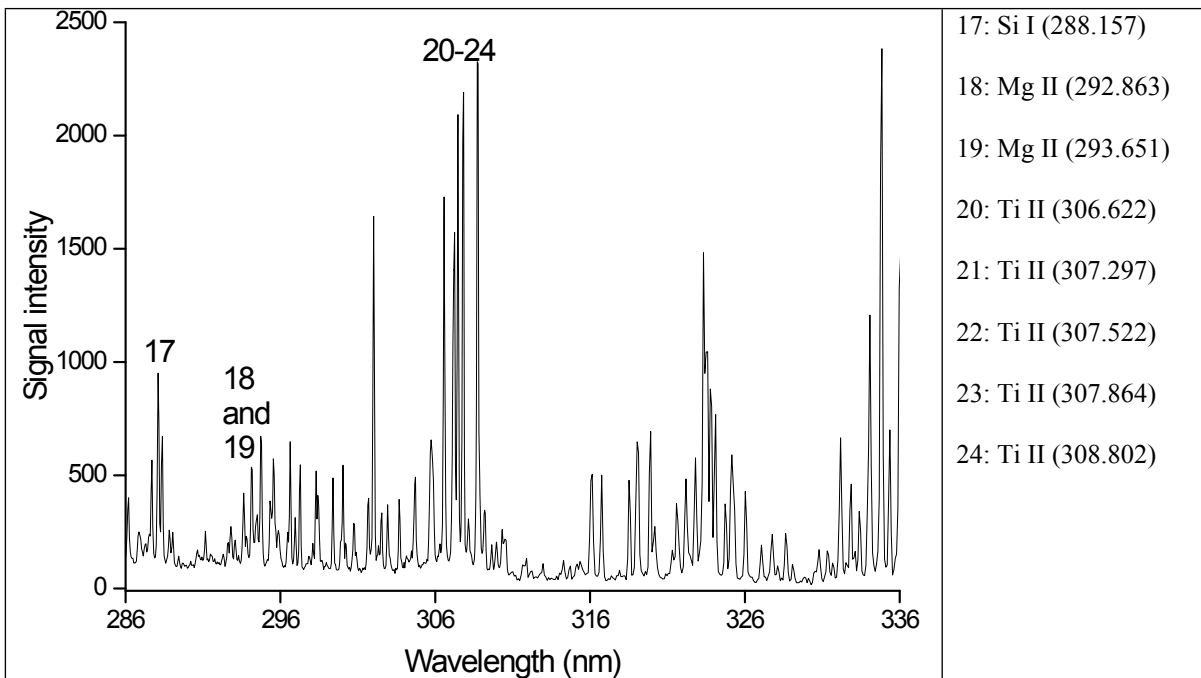

**Figure 23S:** Emission spectrum from 286 to 336 nm for lipstick sample.

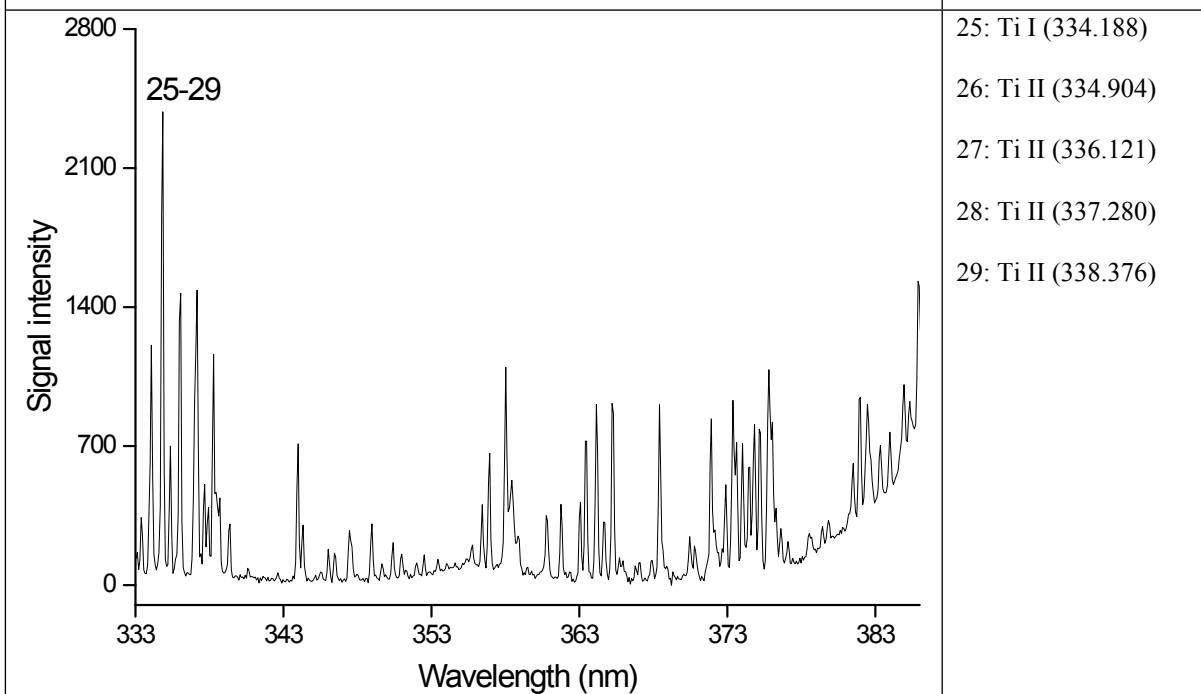

**Figure 24S:** Emission spectrum from 336 to 386 nm for lipstick sample.

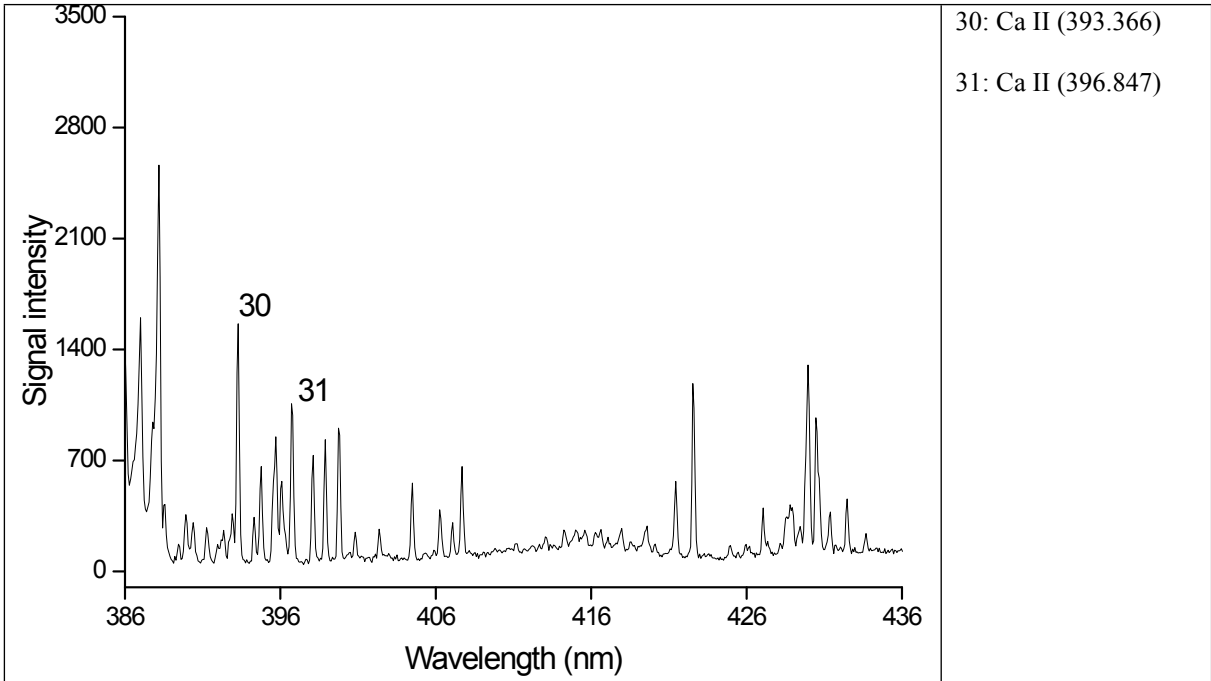

Figure 25S: Emission spectrum from 386 to 436 nm for lipstick sample.

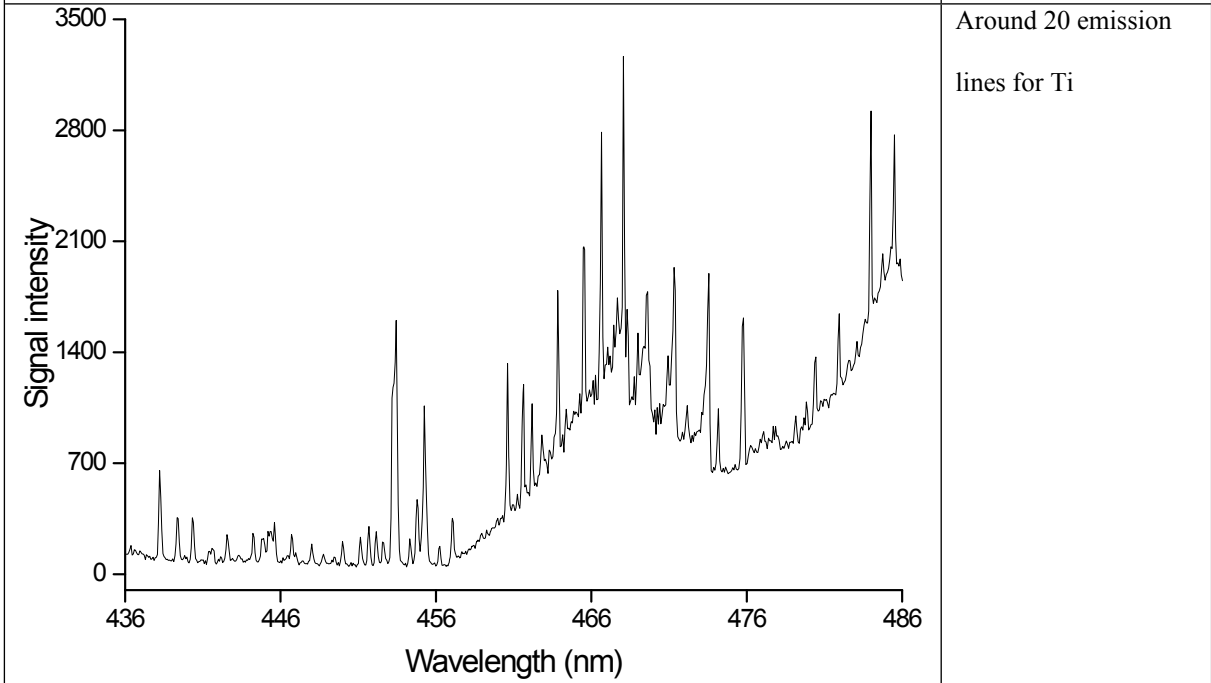

Figure 26S: Emission spectrum from 436 to 486 nm for lipstick sample.

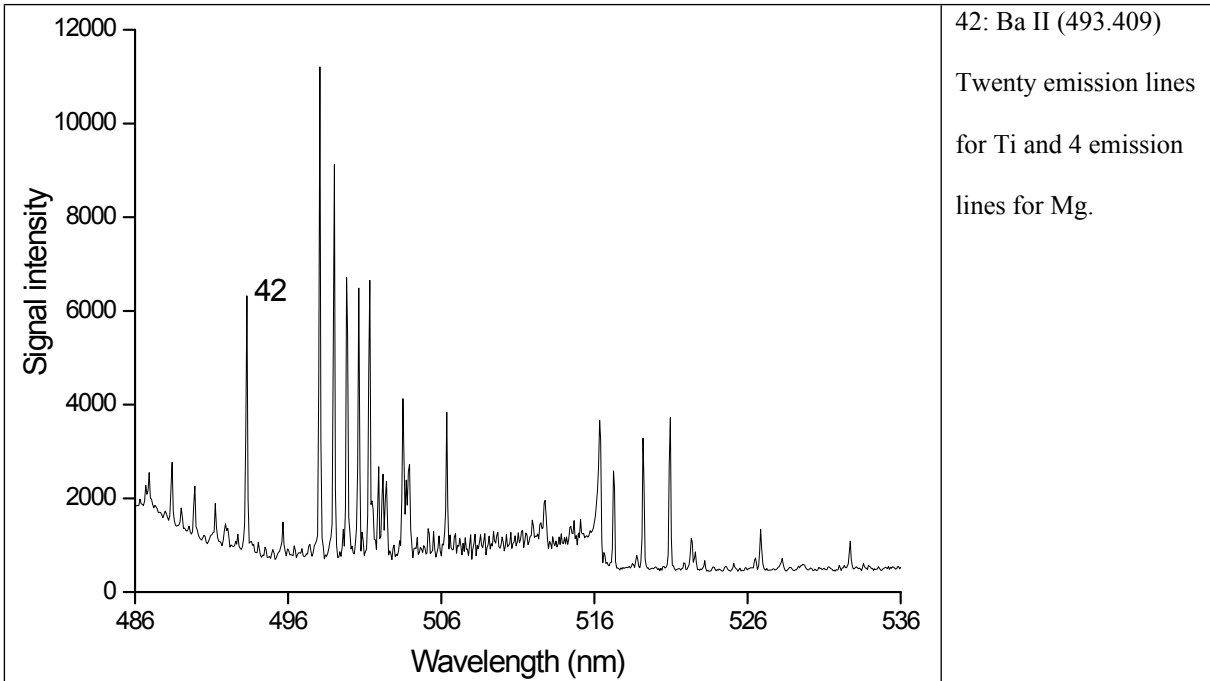

**Figure 27S:** Emission spectrum from 486 to 536 nm for lipstick sample.

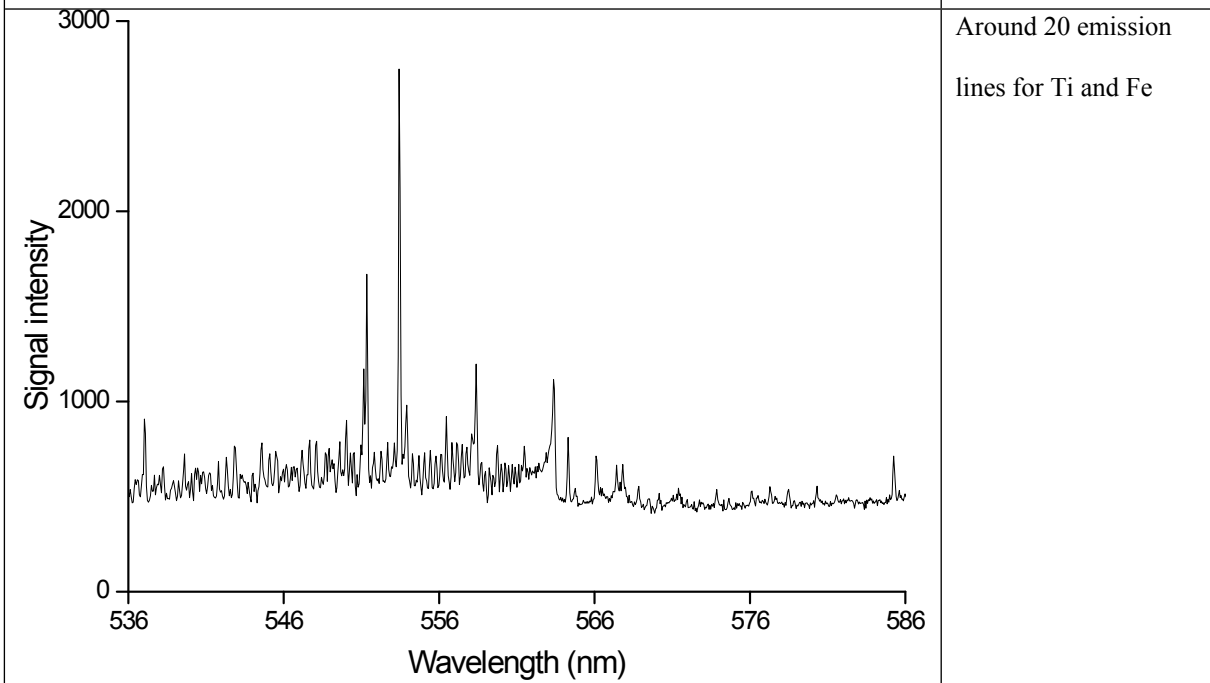

**Figure 28S:** Emission spectrum from 536 to 586 nm for lipstick sample.

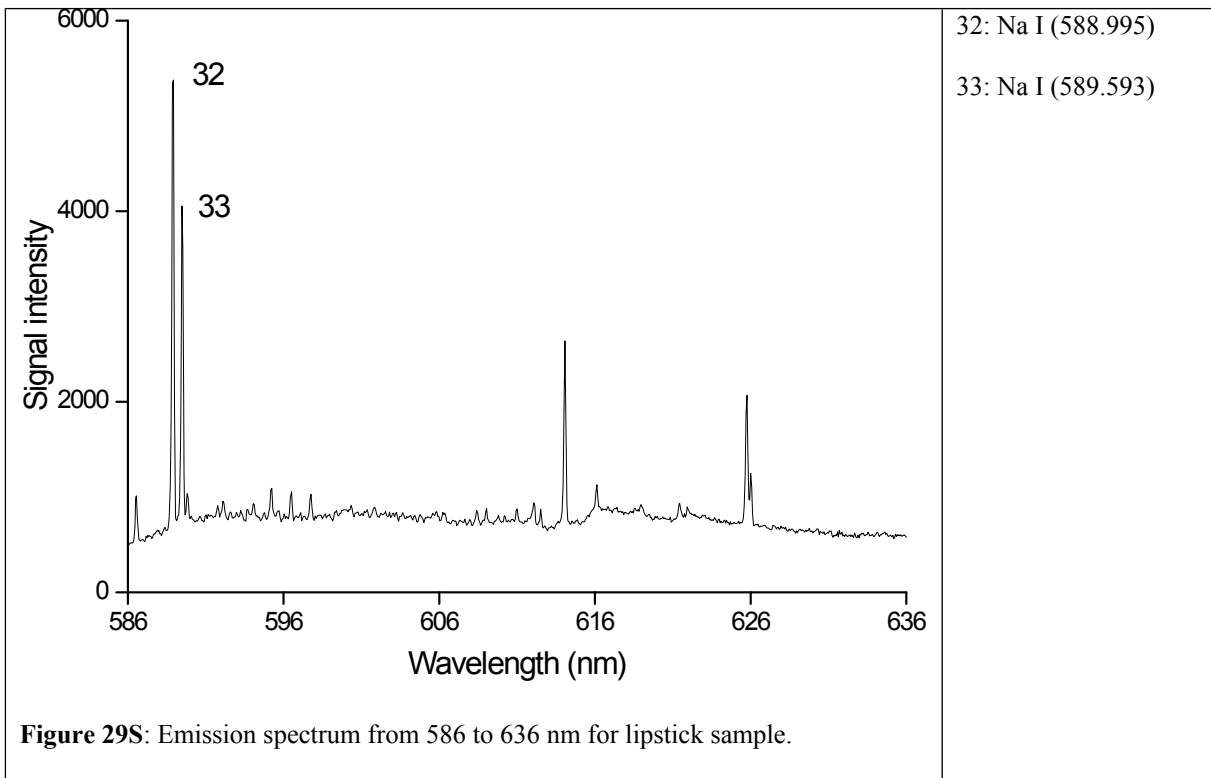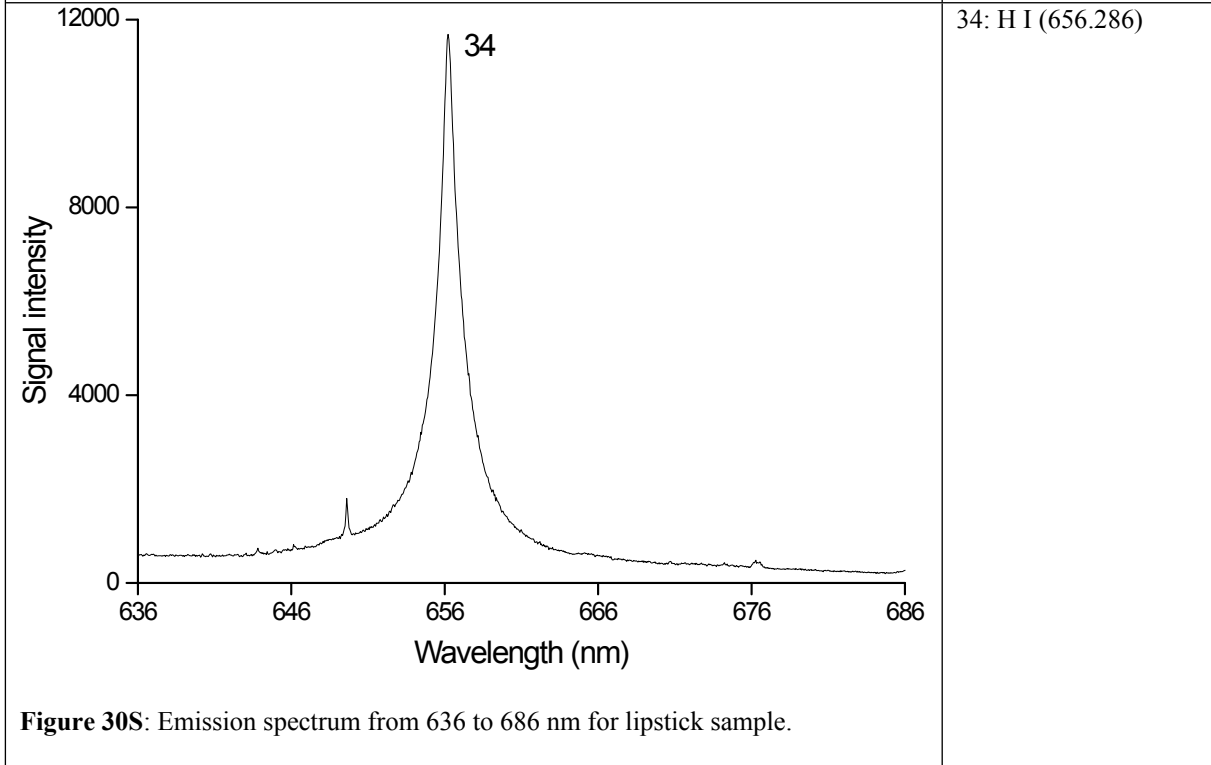

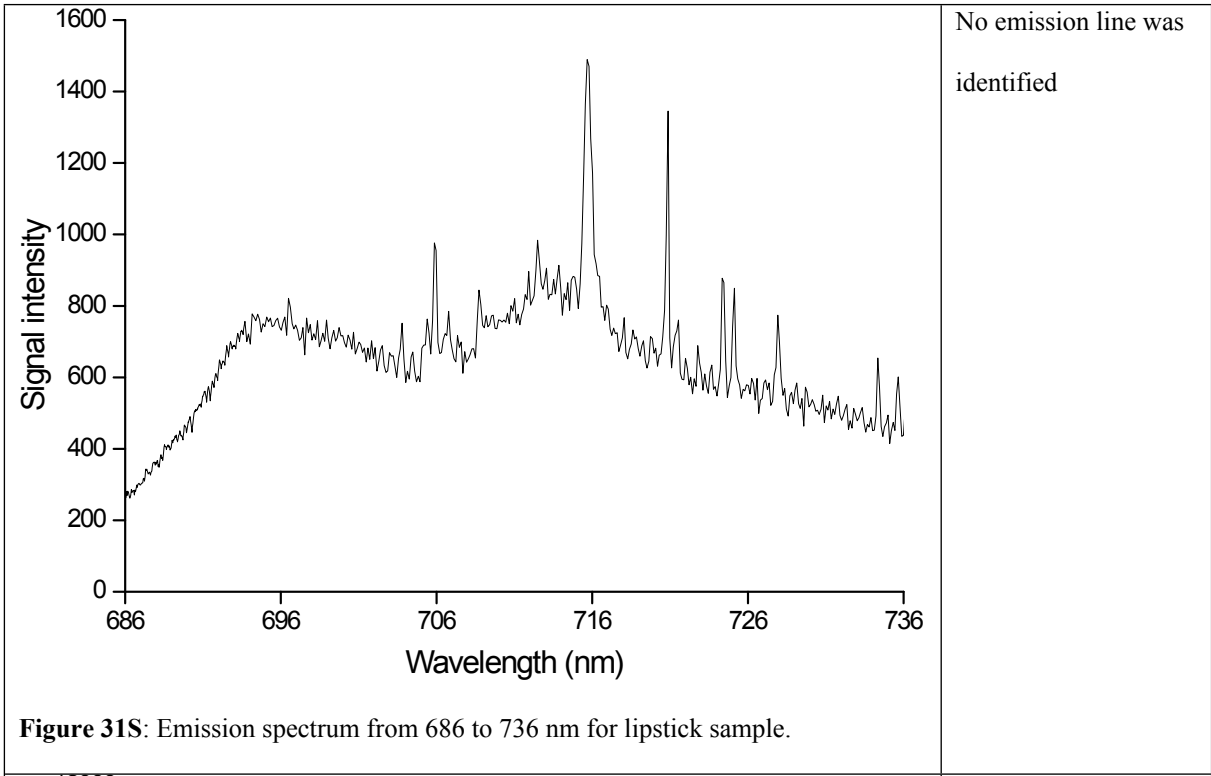

Figure 31S: Emission spectrum from 686 to 736 nm for lipstick sample.

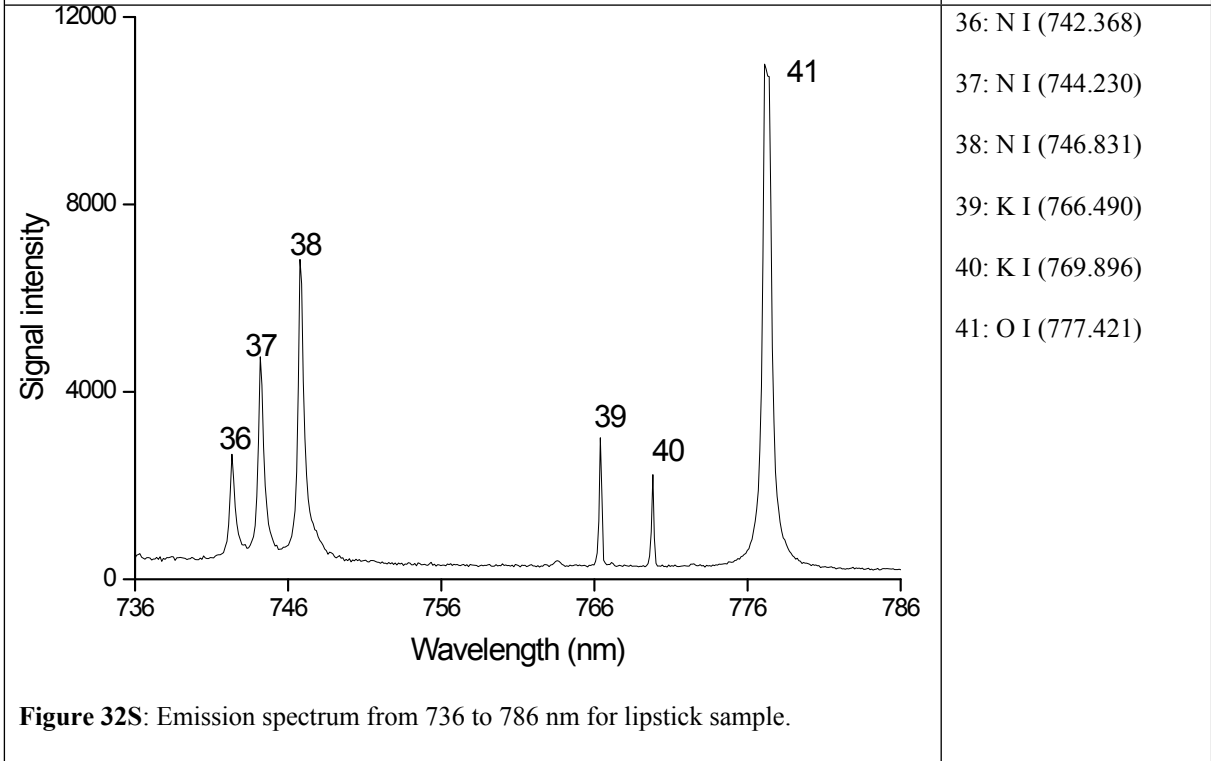

Figure 32S: Emission spectrum from 736 to 786 nm for lipstick sample.

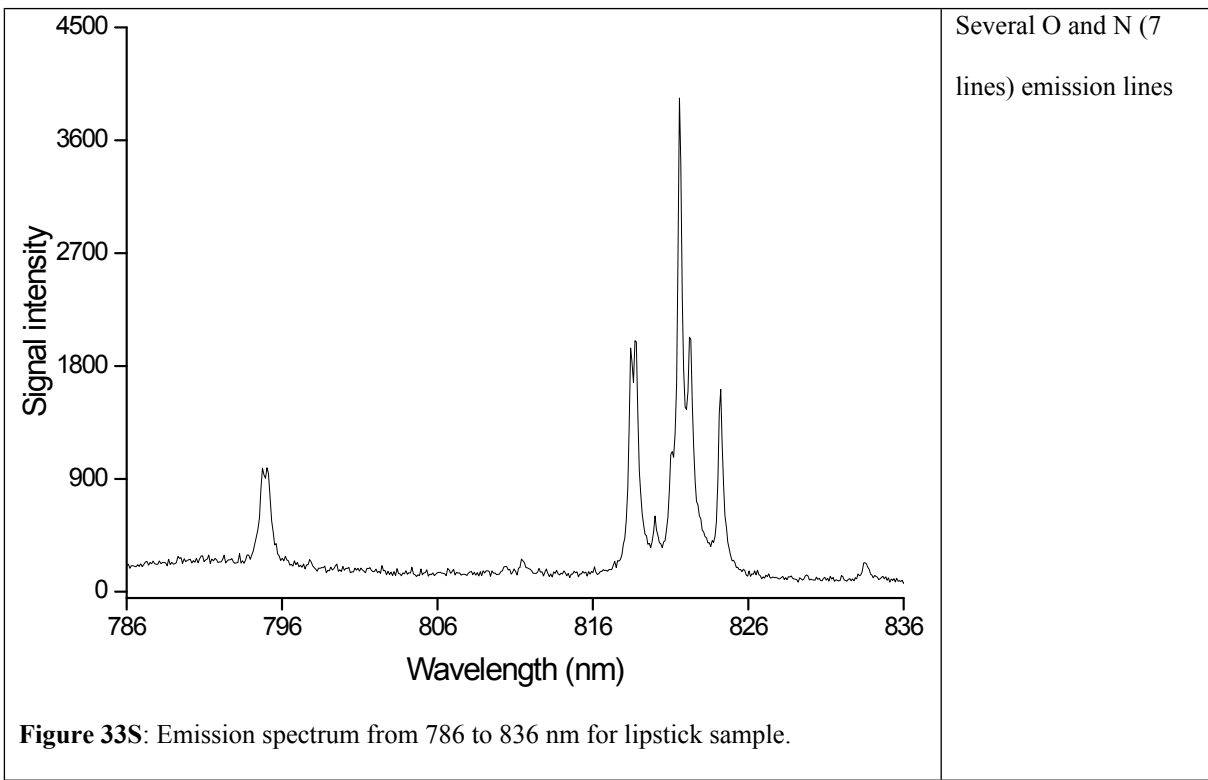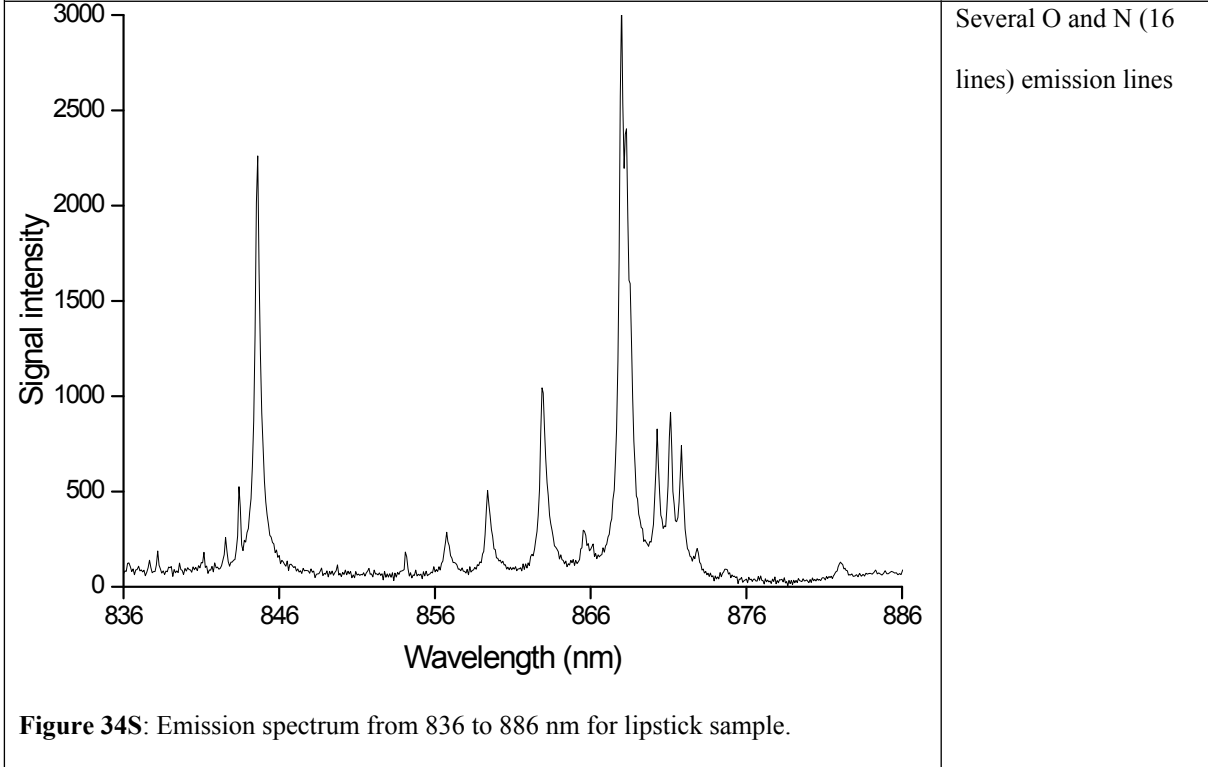

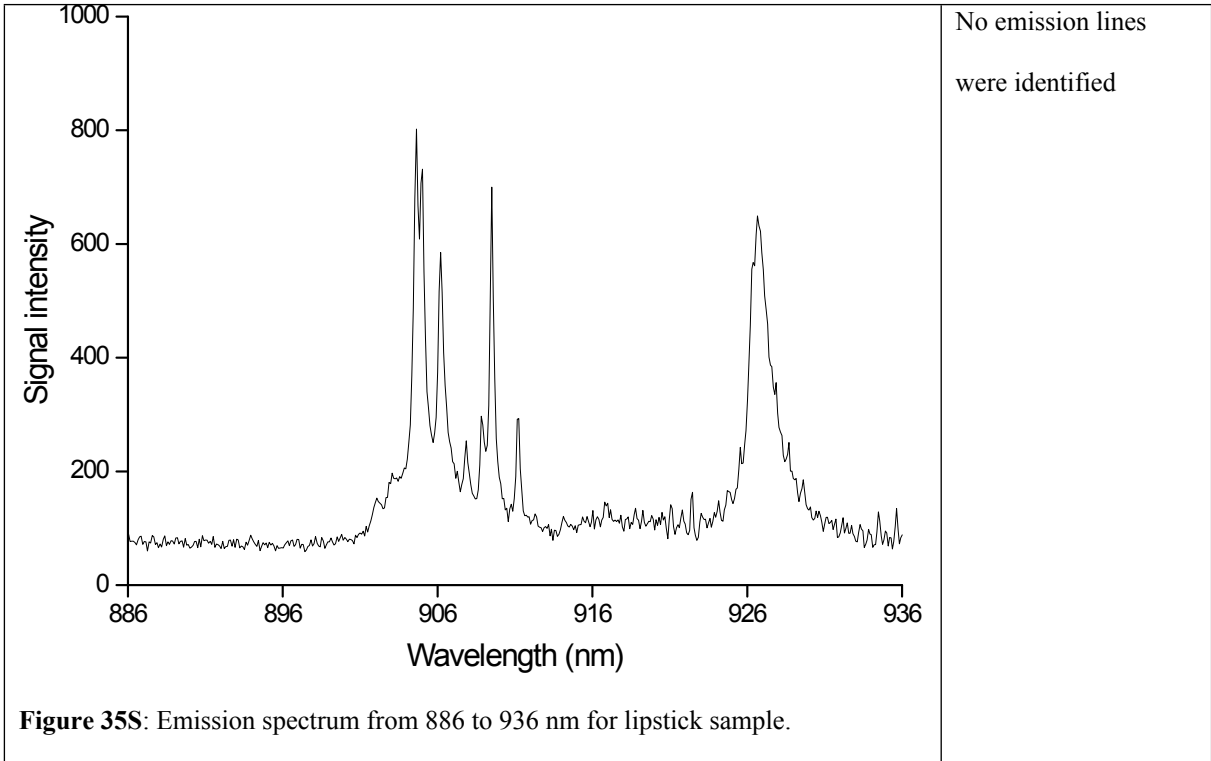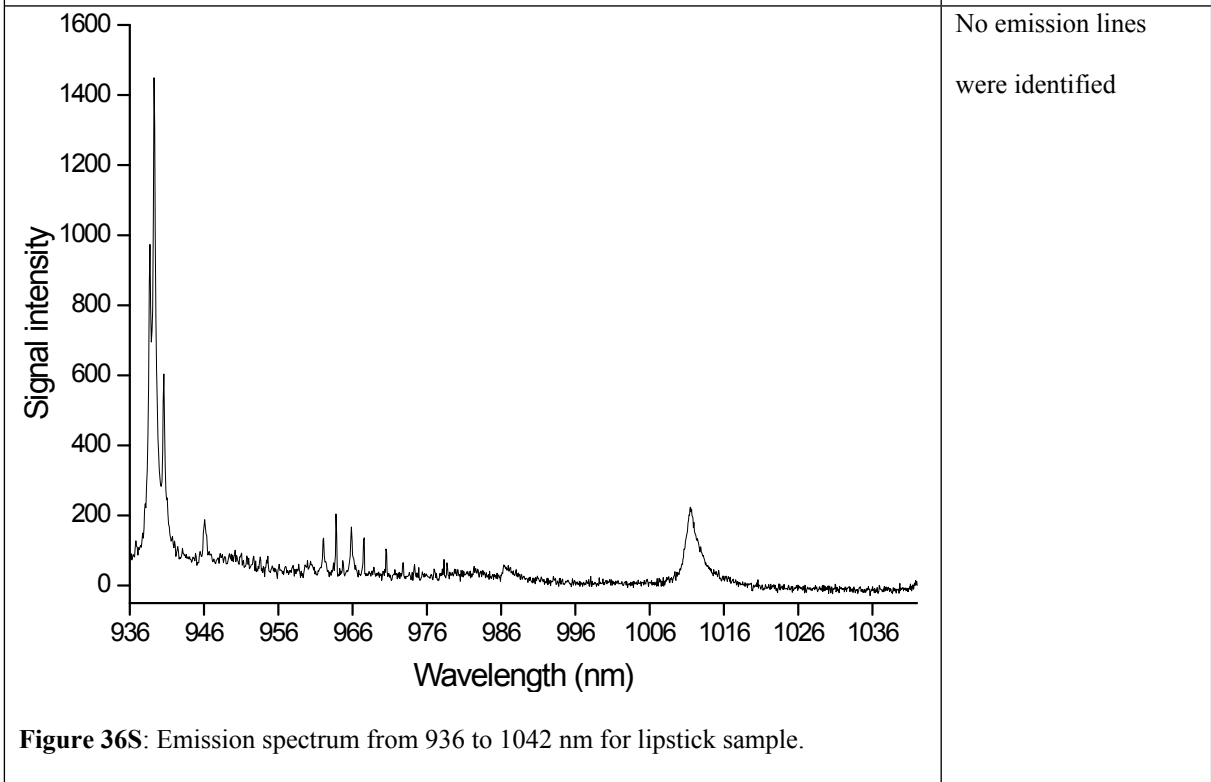



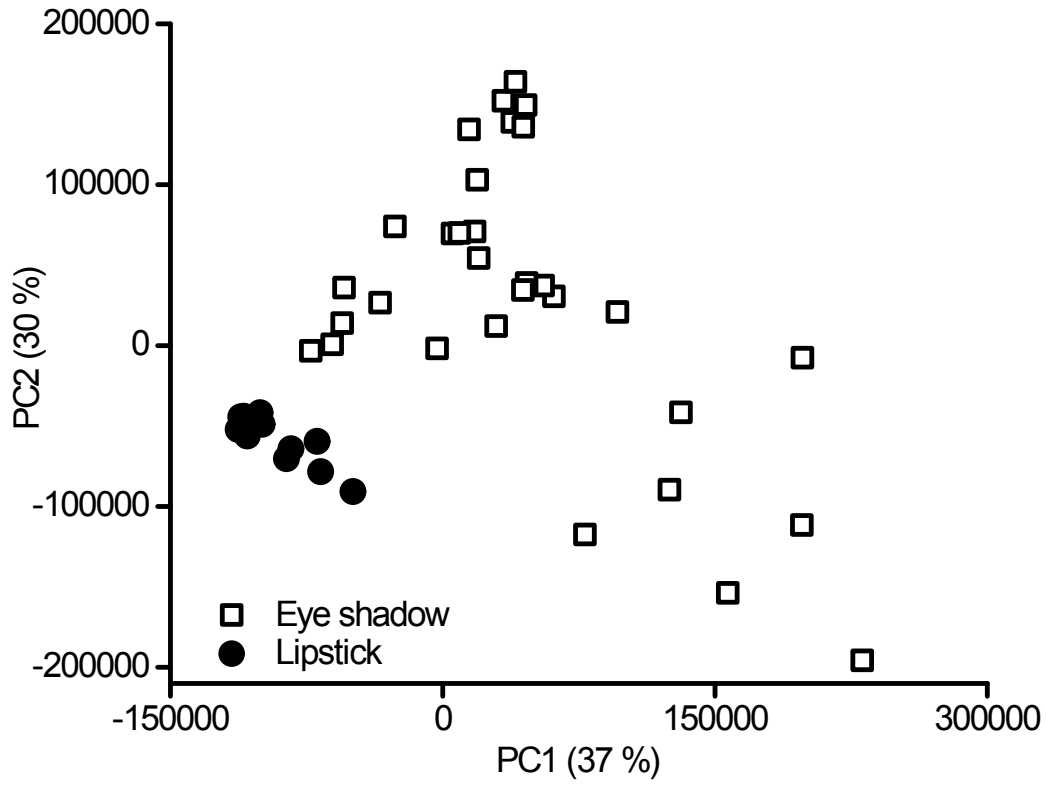

Figure 37S: Scores plot of the results of eye shadow and lipstick samples by LIBS.

Loadings plots for a PCA calculated with eye shadow and lipstick emission data together.

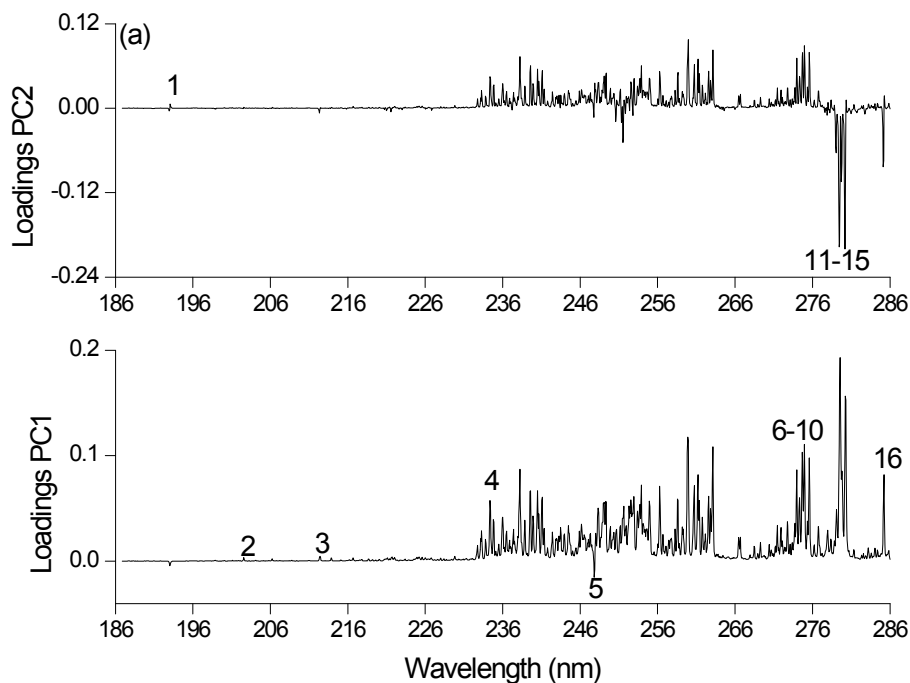

- 1: C I (193.091)
- 2: Si I (212.412)
- 3: Si I (221.667)
- 4: Fe II (234.349)
- 5: C I (247.856)
- 6: Fe II (274.320)
- 7: Fe II (274.648)
- 8: Fe II (274.948)
- 9: Fe I (275.403)
- 10: Fe II (275.573)
- 11: Mg I (277.983)
- 12: Mg II (279.078)
- 13: Mg II (279.533)
- 14: Mg II (279.799)
- 15: Mg II (280.270)
- 16: Mg I (285.213)

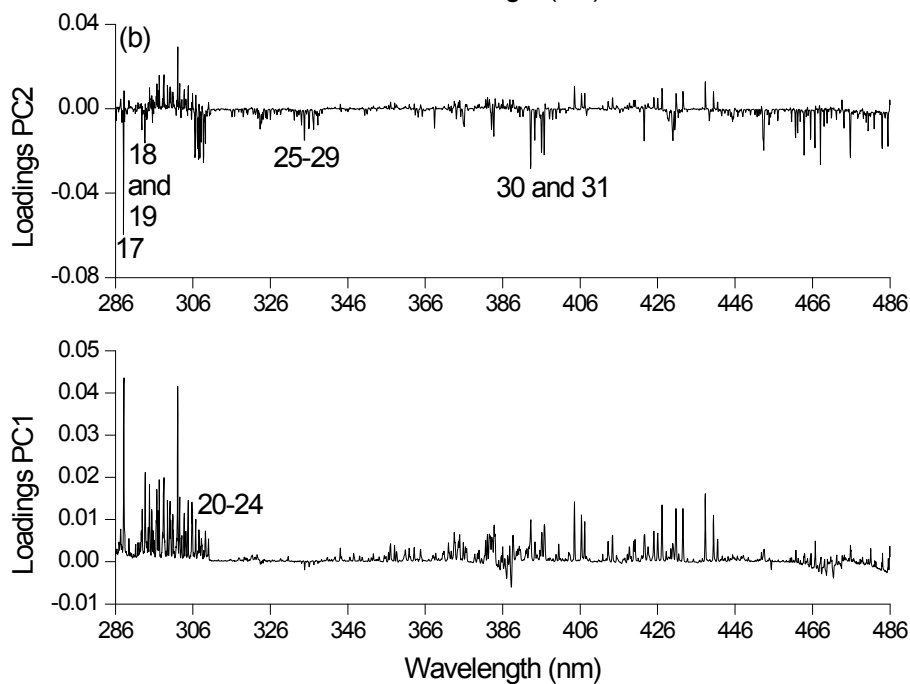

- 17: Si I (288.157)
- 18: Mg II (292.863)
- 19: Mg II (293.651)
- 20: Ti II (306.622)
- 21: Ti II (307.297)
- 22: Ti II (307.522)
- 23: Ti II (307.864)
- 24: Ti II (308.802)
- 25: Ti I (334.188)
- 26: Ti II (334.904)
- 27: Ti II (336.121)
- 28: Ti II (337.280)
- 29: Ti II (338.376)
- 30: Ca II (393.366)
- 31: Ca II (396.847)

From 436 – 486:  
Around 20 emission  
lines for Ti

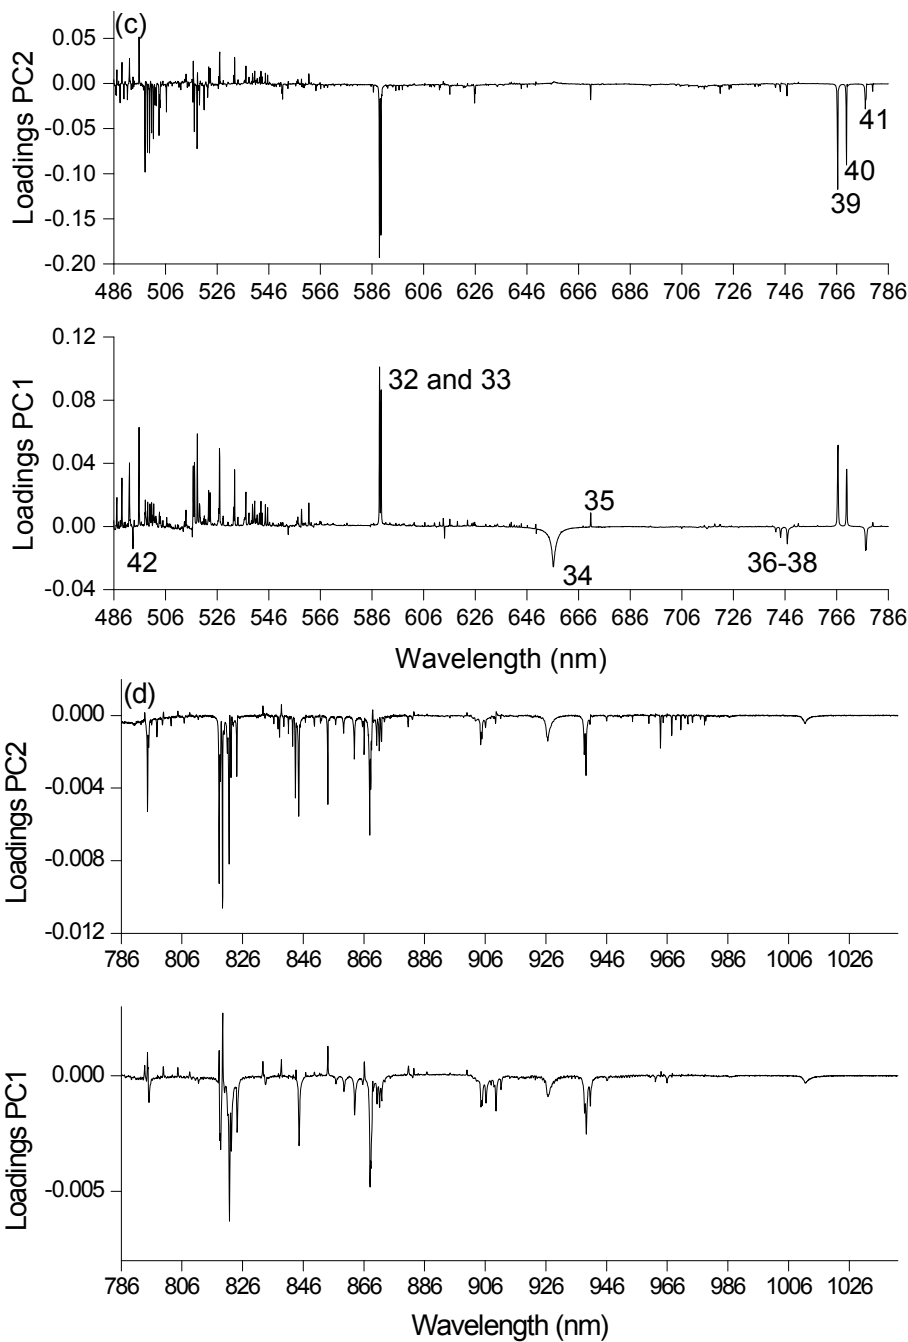

From 486 – 536:  
Twenty emission lines  
for Ti and 4 emission  
lines for Mg.

From 536 – 586:  
Around 20 emission  
lines for Ti and Fe

- 32: Na I (588.995)
- 33: Na I (589.593)
- 34: H I (656.286)
- 35: Li I (670.776)
- 36: N I (742.368)
- 37: N I (744.230)
- 38: N I (746.831)
- 39: K I (766.490)
- 40: K I (769.896)
- 41: O I (777.421)
- 42: Ba II (493.409)

From 786 – 836:  
Several O and N (7  
lines) emission lines

From 836 – 886:  
Several O and N (16  
lines) emission lines

**Figure 38S** – Loadings plots of PCA calculated for eye shadow and lipstick samples analysed by LIBS. For better visualization, the spectral range was divided in 4 different figures (a – d).

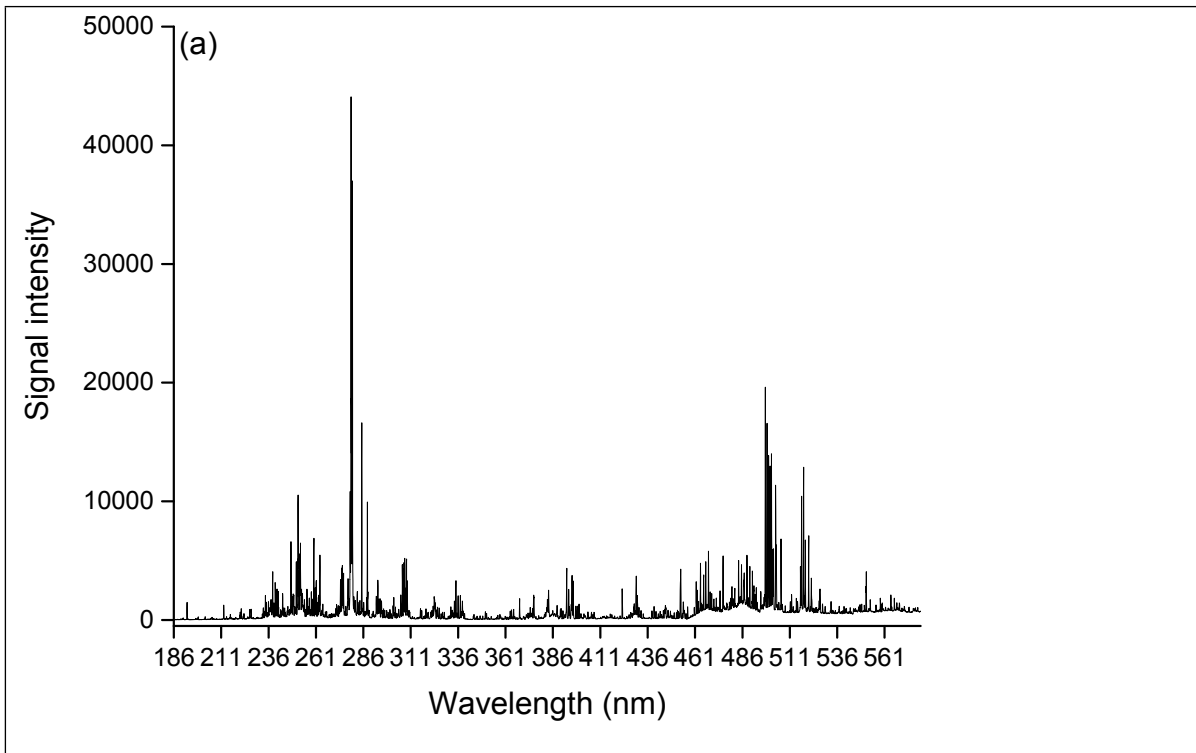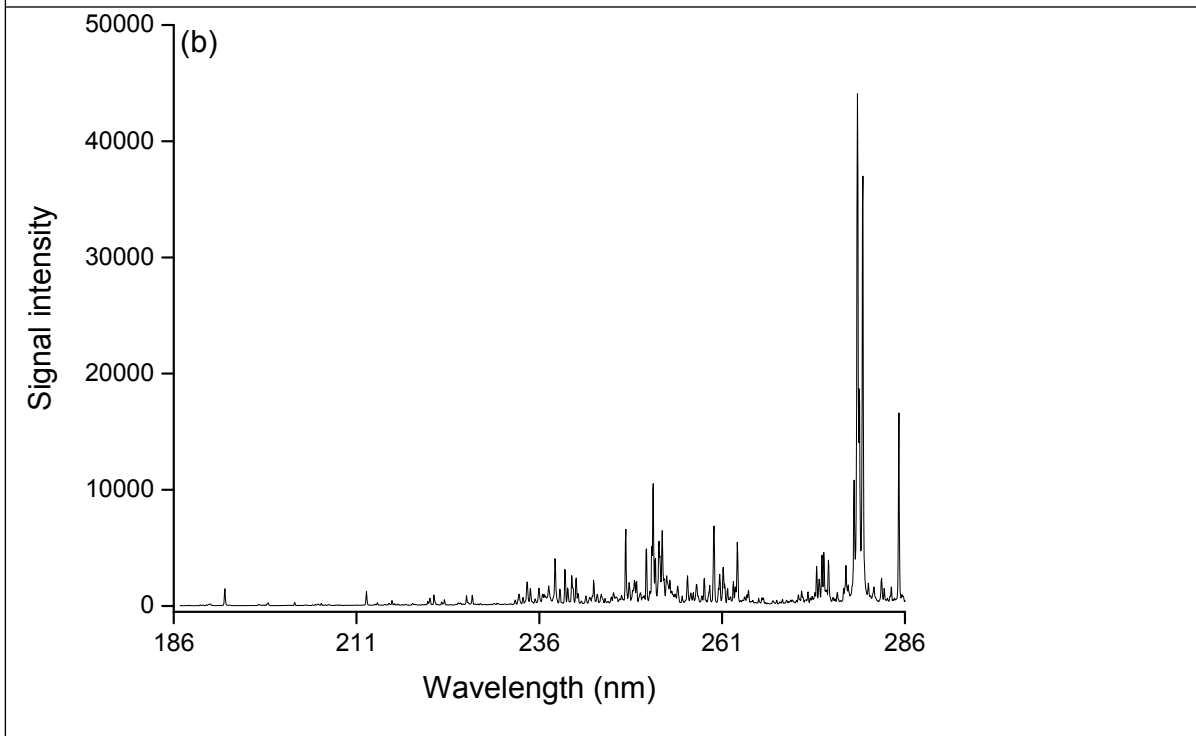

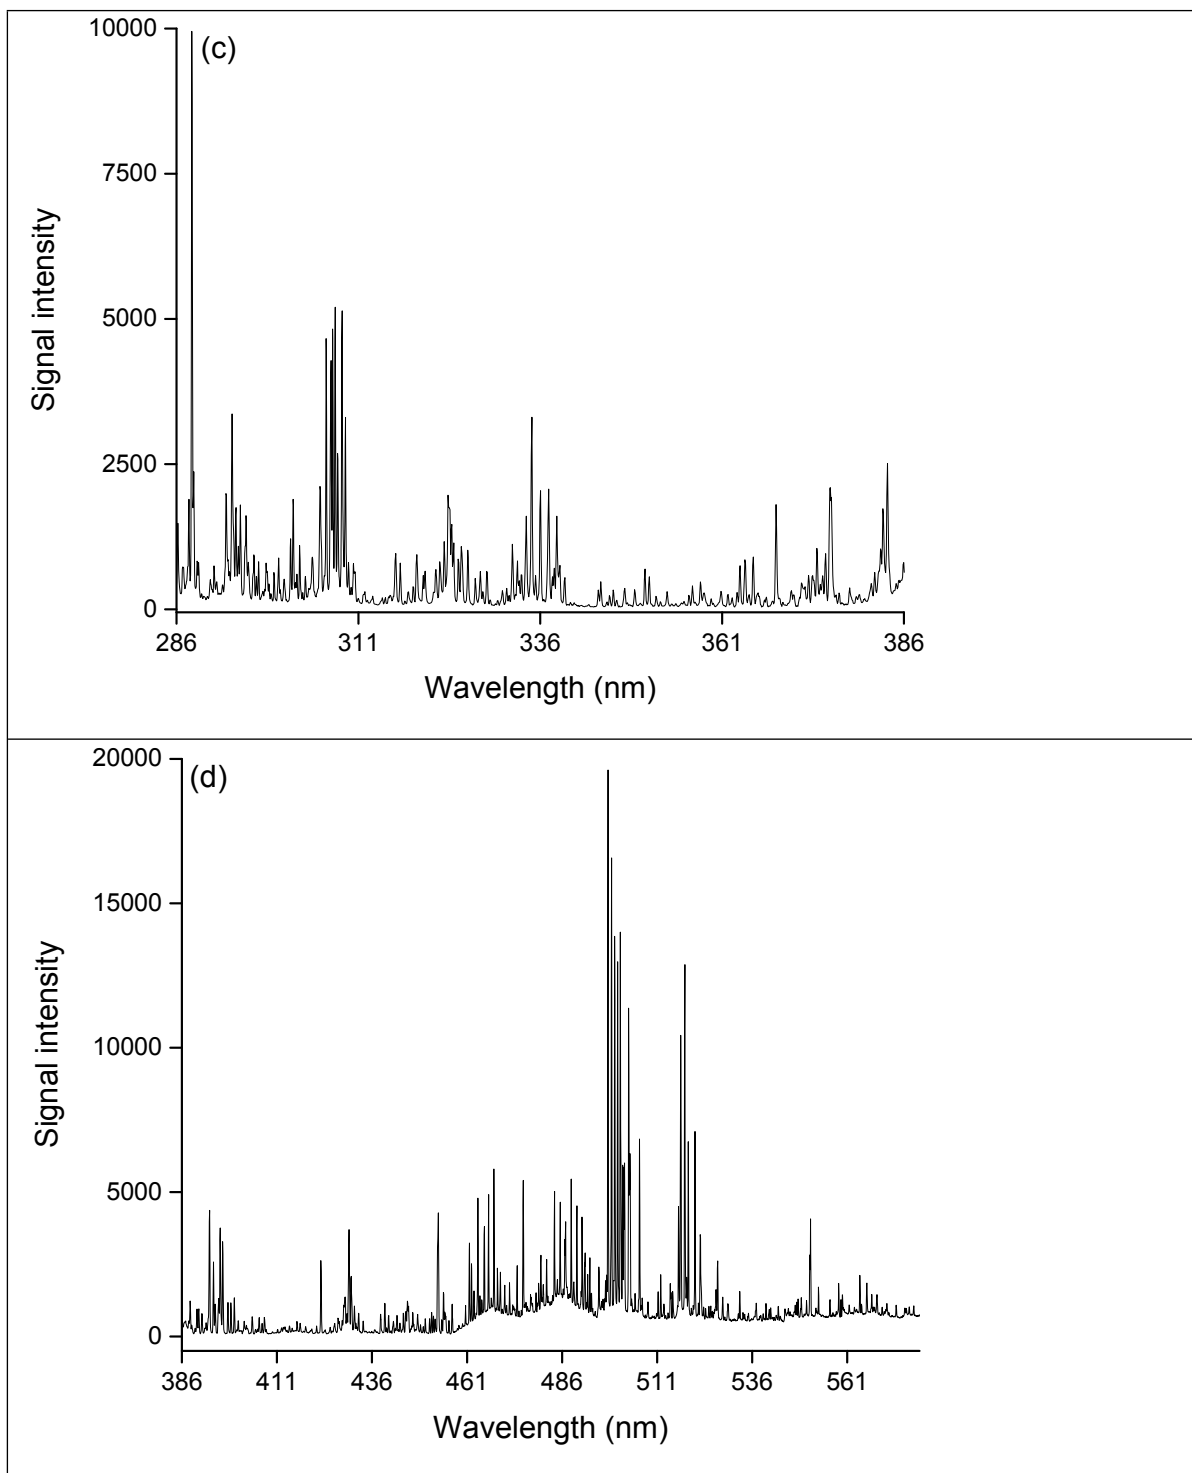

**Figure 39S** – Average emission spectra for eye shadow samples with elements concentration below 5 mg kg<sup>-1</sup> (a: spectral range from 186 – 580, b: spectral range from 186 – 286, c: spectral range from 286 – 386, d: spectral range from 386 – 580 nm).

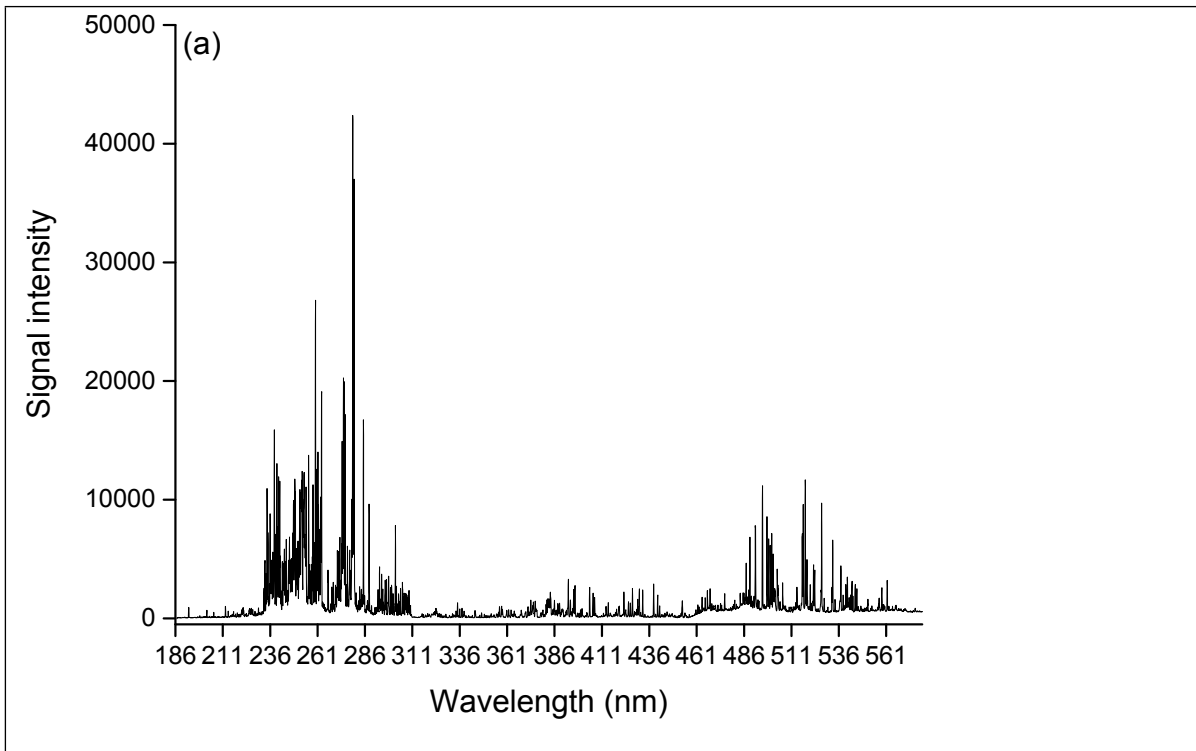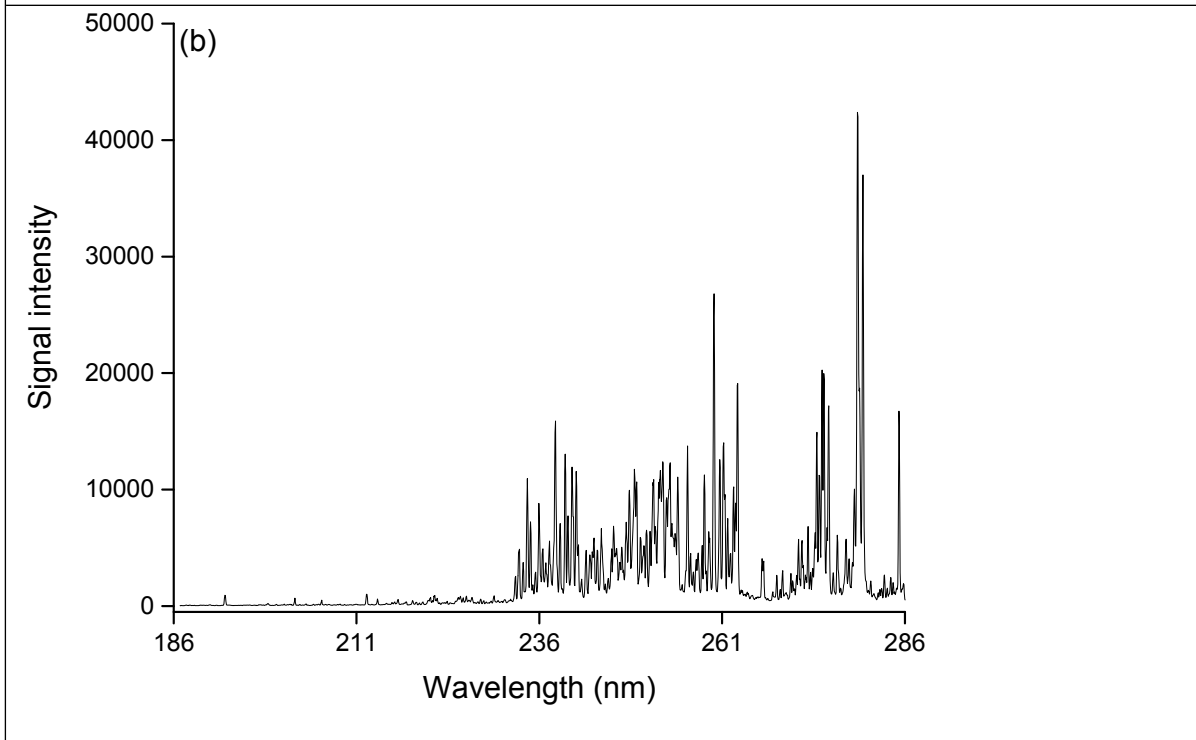

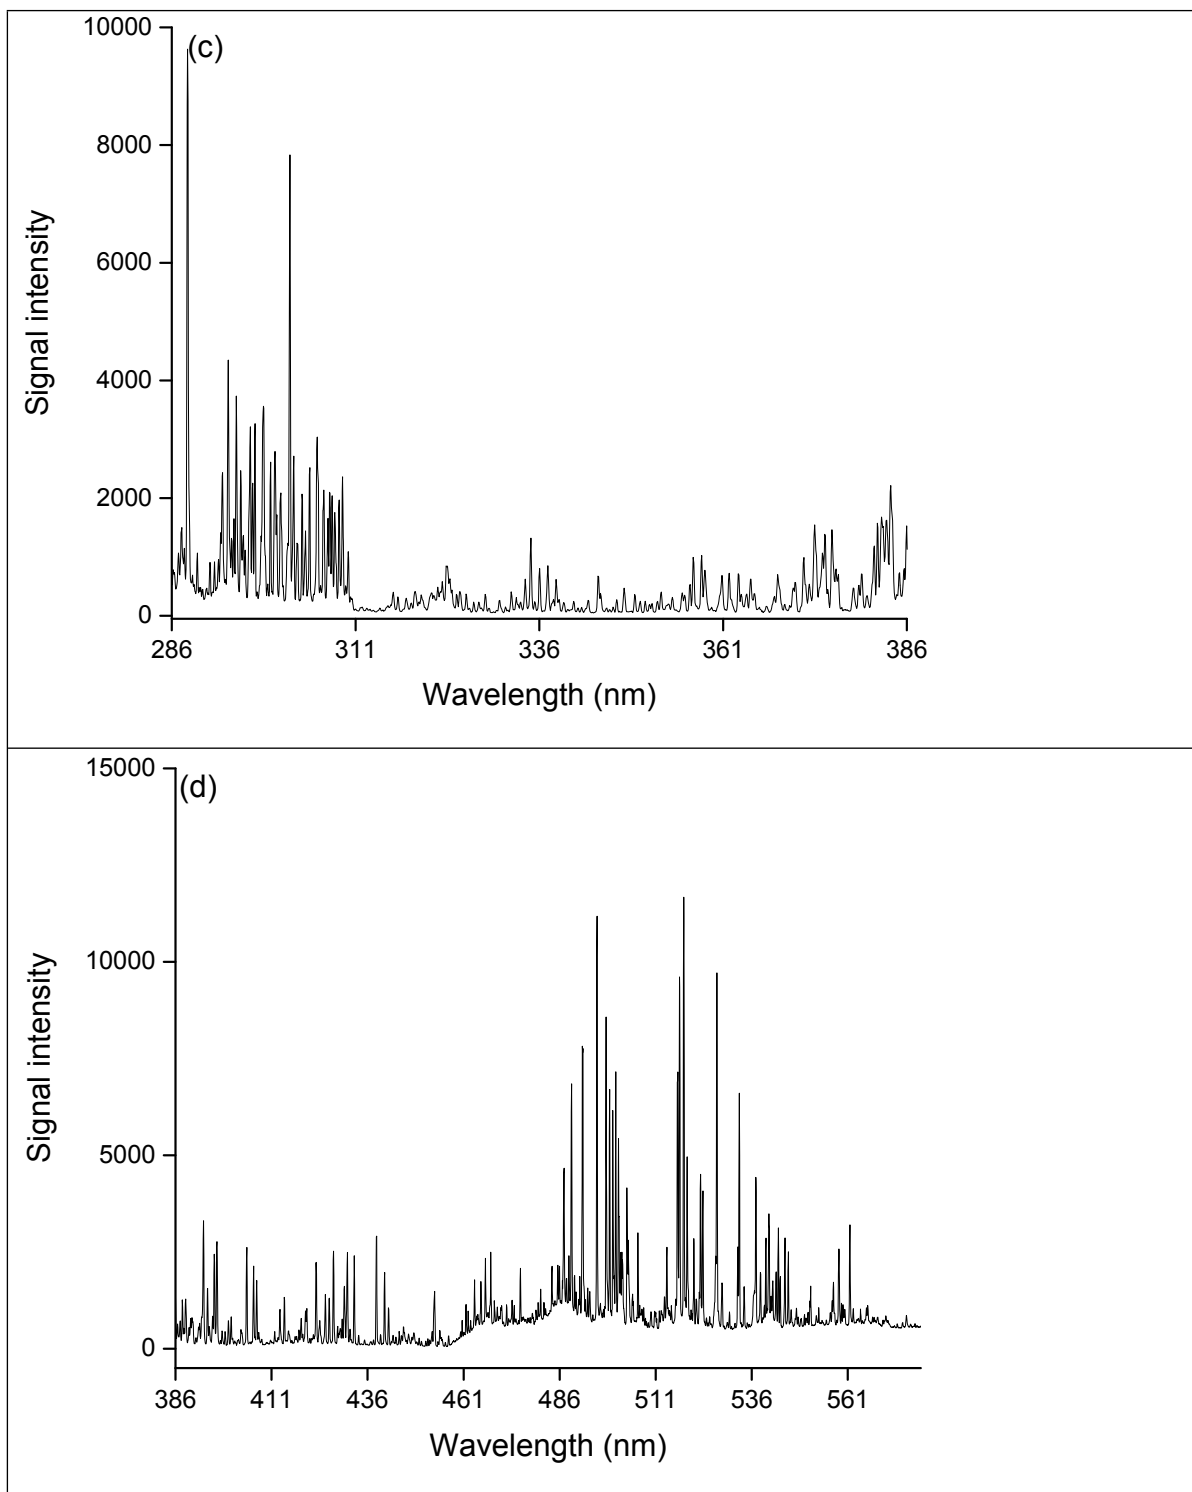

**Figure 40S** – Average emission spectra for eye shadow samples with elements concentration above  $5 \text{ mg kg}^{-1}$  (a: spectral range from 186 – 580, b: spectral range from 186 – 286, c: spectral range from 286 – 386, d: spectral range from 386 – 580 nm).

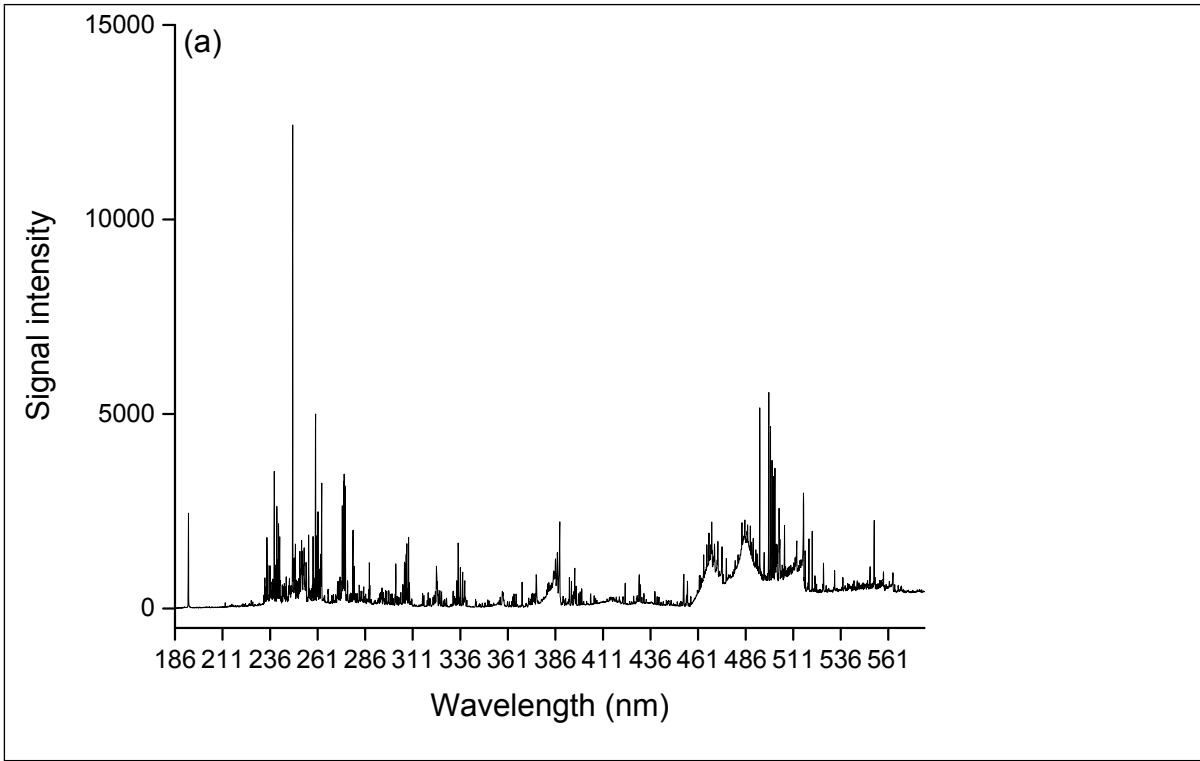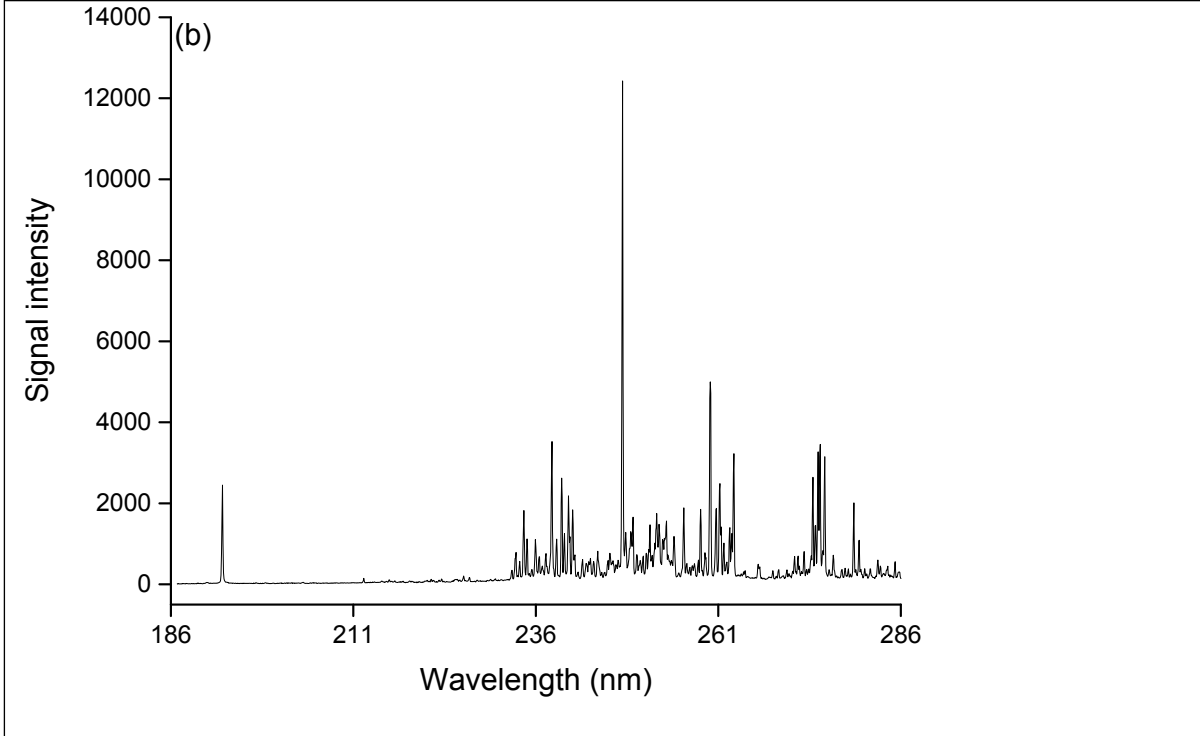



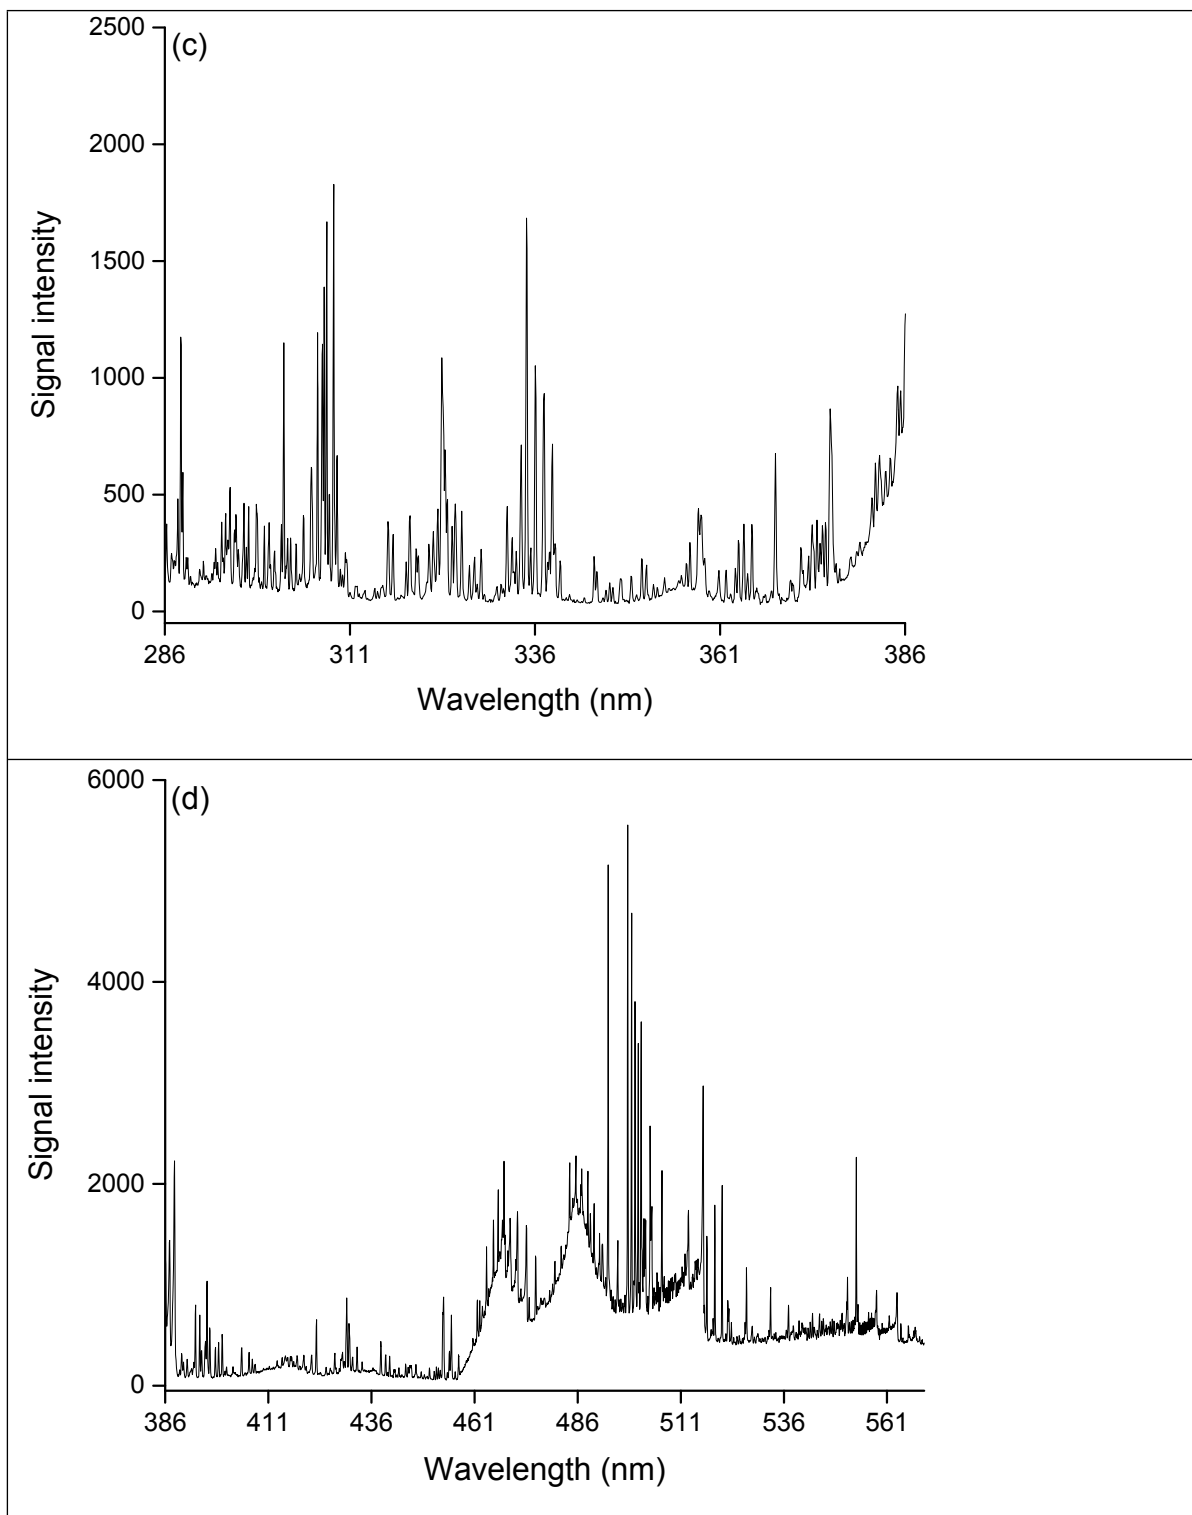

**Figure 41S** – Average emission spectra for lipstick samples with elements concentration below  $5 \text{ mg kg}^{-1}$  (a: spectral range from 186 – 580, b: spectral range from 186 – 286, c: spectral range from 286 – 386, d: spectral range from 386 – 580 nm).

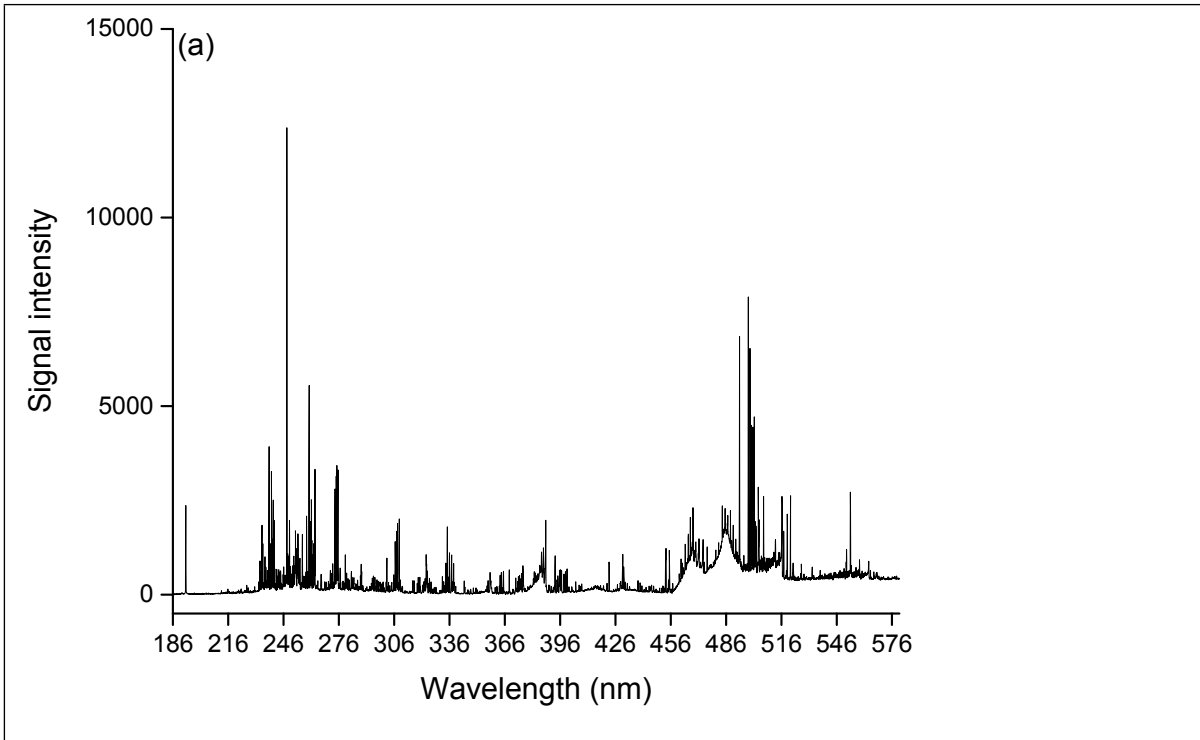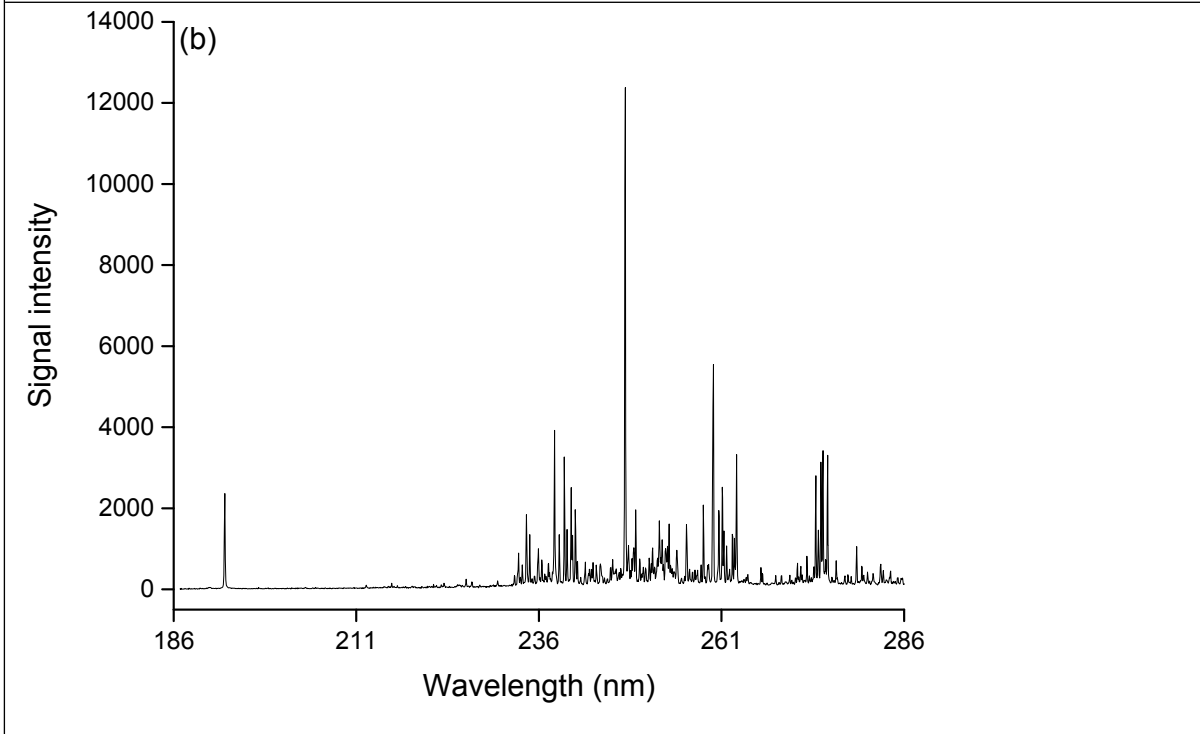

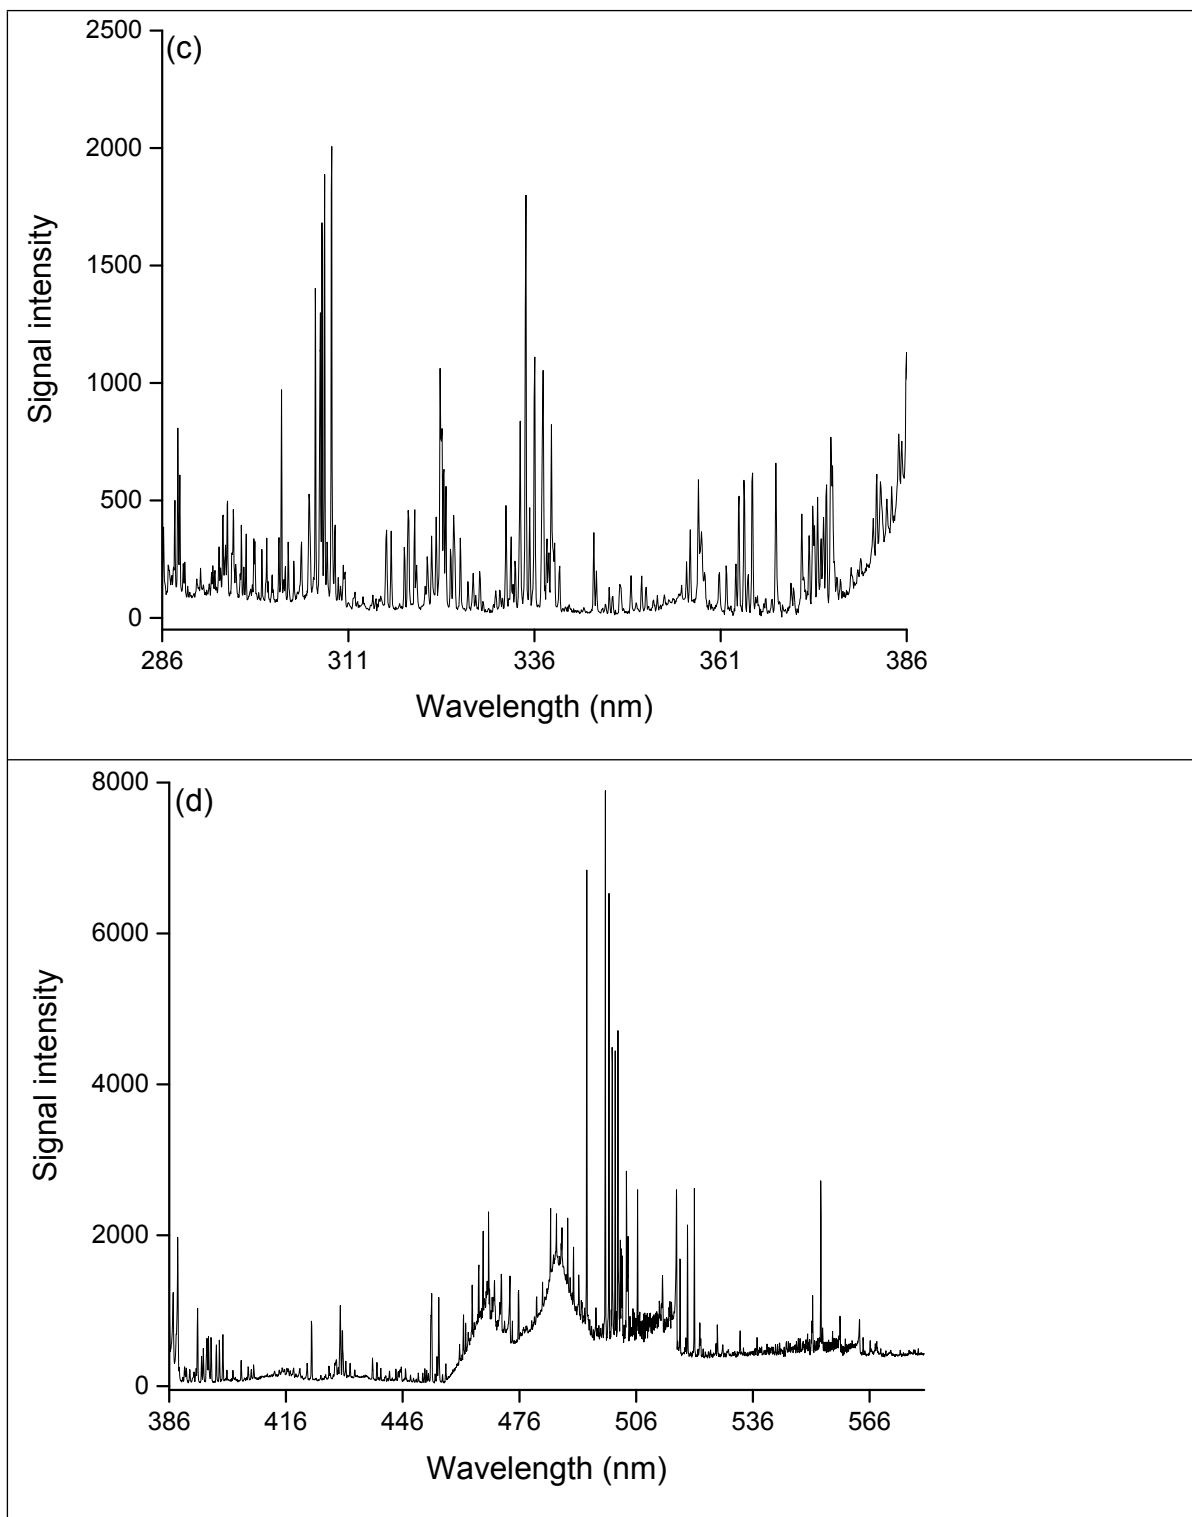

**Figure 42S** – Average emission spectra for lipstick samples with elements concentration above  $5 \text{ mg kg}^{-1}$  (a: spectral range from 186 – 580, b: spectral range from 186 – 286, c: spectral range from 286 – 386, d: spectral range from 386 – 580 nm).
